# Landscapes of ribosome dwell times and relationship with aminoacyl-tRNA levels in mammals

Cédric Gobet<sup>1,2</sup>, Benjamin Weger<sup>1,2</sup>, Julien Marquis<sup>2,3</sup>, Eva Martin<sup>2</sup>, Frédéric Gachon<sup>\*1,2,4</sup>, Felix Naef<sup>\*1</sup>

<sup>1</sup> Institute of Bioengineering, School of Life Sciences, Ecole Polytechnique Fédérale de Lausanne, Lausanne CH-1015, Switzerland

<sup>2</sup> Nestlé Research, CH-1015 Lausanne, Switzerland

<sup>3</sup> Current address: Lausanne Genomic Technologies Facility, Université de Lausanne, Lausanne CH-1015, Switzerland

<sup>4</sup> Current address: Institute for Molecular Bioscience, The University of Queensland, St. Lucia, Brisbane, QLD 4072, Australia

★ Corresponding authors

## Abstract

Protein translation depends on mRNA-specific initiation, elongation and termination rates. While ribosome elongation is well studied in bacteria and yeast, less is known in higher eukaryotes. Here, we combined ribosome and tRNA profiling to investigate the relations between ribosome elongation rates, (aminoacyl-) tRNA levels, and codon usage in mammals. We modeled codon-specific ribosome dwell times and translation efficiencies from ribosome profiling, considering codon-pair interactions between ribosome sites. In mouse liver, the model revealed site and codon specific dwell times, as well as codon-pair interactions clustering by amino acids. While translation efficiencies varied significantly across diurnal time and feeding regimen, codon dwell times were highly stable and conserved in human. Profiling of tRNA levels correlated with codon usage and several tRNAs were lowly aminoacylated, which was conserved in fasted mice. Finally, codons with lowly aminoacylated tRNAs and high codon usage relative to tRNA abundance exhibited long dwell times. Together, these analyses started to reveal complex dependencies between ribosome dwell times, tRNA loading, and codon usage in mammals.

## 27 Introduction

28 Translation dynamically controls gene expression in processes such as development, the cell  
29 cycle, circadian rhythms, and response to stress [1]. At least three steps underlie protein trans-  
30 lation: translation initiation, often thought to be rate limiting, elongation, and termination [2].  
31 Recently, however, elongation has emerged as an important layer to fine-tune gene expression  
32 (reviewed in [3]). Indeed, variations in elongation rates may influence gene expression [4, 5,  
33 6, 7, 8] and recent studies showed that alteration of ribosome elongation rates in cancer cells  
34 influences their proliferation and invasion capabilities [9, 10, 11].

35 While the links between translation elongation and gene expression are increasingly studied,  
36 the determinants of ribosome elongation rates are poorly understood, notably in higher eukary-  
37 otes. In unicellular organisms, ribosome elongation rates are well explained by tRNA copies and  
38 expression [12]. This is also reflected evolutionarily, since highly expressed genes are enriched  
39 for fast codons with high concentrations of tRNAs [13]. Pioneering work in *E.coli* showed that  
40 ribosomes elongation rates are different for the codons GAA and GAG [14], decoded by the  
41 same tRNA. This raises the possibility that elongation rate is not only determined by the con-  
42 centration of tRNAs, but that codon-anticodon interactions as well as codon context may play  
43 important roles.

44 More recently, the development of ribosome profiling (RP) shed new light on the regulation of  
45 translation [15], including recently in human tissues [16]. Notably, the possibility to capture the  
46 positions of translating ribosomes on mRNAs [17] fostered the development of quantitative mod-  
47 els providing genome-wide insights on key features regulating ribosome elongation rate [18, 19,  
48 20, 21]. For instance, the properties of amino acids [22], (aminoacyl-) tRNA availability [23, 24,  
49 25], tRNA modifications [26, 27, 28], secondary structures of mRNAs [29, 30, 31], folding of the  
50 nascent chain [32], pairs of codons [33, 34], and sterical interactions with the ribosome exit tun-  
51 nel [35], were shown to influence the local density of ribosomes on transcripts. While RP studies  
52 have brought new knowledge on translation elongation, these were performed mostly in unicel-

53 lular organisms and have led to divergent results as highlighted in several meta-analyses [19,  
54 36]. One reason is that ribosome footprints are sensitive to biases from differences in protocols  
55 [37, 38, 39, 40, 41], library preparations [21], and data analysis pipelines [42]. Consequently, the  
56 reported correlations between elongation rates, tRNA abundances, and codon usage frequency  
57 and bias [43], show inconsistencies. In addition, while codon usage can be precisely estimated,  
58 it remains difficult to measure tRNA concentrations. Indeed, tRNAs exhibit a high degree of  
59 modifications and complex secondary structures, which alter cDNA synthesis and biases quan-  
60 tification by high-throughput sequencing [44]. Thus, improved methods have been proposed to  
61 quantify tRNAs [45, 46, 47, 9], as well as tRNA aminoacylation levels [48].

62 Here, to better establish the determinants of ribosome elongation rate in higher eukaryotes, we  
63 combined modeling of ribosome profiling data, codon usage analysis, and (aminoacyl-) tRNA  
64 profiling in mouse liver. In particular, we built a genome-wide statistical model that allowed  
65 us to identify key features predicting ribosome densities along transcripts, notably the contri-  
66 butions to the elongation rates of single codons, as well as pairs of codons within and near the  
67 ribosome E, P and A sites. In yeast, our analysis was able to identify novel features of previously  
68 reported pairs of adjacent codons that slow down ribosome elongation. In mouse liver, we found  
69 a wider dynamic range of codon- and amino acid-specific ribosome dwell times (DTs, defined  
70 as the inverse of the elongation rates, Methods). In addition to single-codon contributions to  
71 DTs, we identified codon pairs contributing synergistically to the DTs, and notably involving  
72 codons on the ribosome P and A sites. In mouse liver, the identified contributions of single-  
73 codon and codon-pair DTs were remarkably stable along the feeding/fasting cycle, and even  
74 under conditions of prolonged fasting. Moreover, meta-analysis in mammals revealed conserved  
75 DTs between mouse tissues and human, which were however significantly distinct from those in  
76 yeast. Finally, we extended a recent tRNA profiling method [9] to quantify (aminoacyl-) tRNA  
77 levels in liver of *ad libitum* (AL) fed and fasted mice (FA). tRNA levels correlated with codon  
78 usage and several tRNAs were lowly aminoacylated, which was conserved in fasted mice. These

79 data, together with codon usage properties, allowed us to explain some codon-specificity in the  
80 estimated ribosome DTs.

## 81 Results

### 82 Modeling codon-specific DTs including single- and codon-pair contributions

83 Ribosome profiling read counts along transcripts typically show large variations with high and  
84 low densities of ribosomes. To estimate ribosome DTs in higher eukaryotes from those data, we  
85 explicitly fit RP read counts on a genome-wide scale, extending previous models [18, 20]. We  
86 are interested in steady-state translation, and additionally assumed no ribosome drop-off and  
87 low density of ribosomes per transcript (no traffic jams), such that the probability of finding  
88 a ribosome at a specific position on an mRNA is proportional to a position-independent gene  
89 translation flux times a position-dependent ribosome DT. To investigate how the codon context  
90 determines the DTs, we assumed that DTs depend on the codons translated in the E, P, and  
91 A sites, as well as surrounding sequences (Fig.S1A). In particular, we modeled DTs additively  
92 in log-space using single-codon contributions as well as synergistic (non-additive) contributions  
93 from pairs of codons in the E and P (noted E:P), P and A (P:A), or E and A (E:A) sites  
94 (Fig.S1A-B). The additive log-scale model for the DTs is equivalent to modeling the elongation  
95 rates at any given position with an Arrhenius rate equation, in which the activation energy has  
96 both single-codon contributions, as well as contributions from pairs of codons. Note that an  
97 inherent property of such approaches is that the DTs cannot be estimated in absolute units, but  
98 only relative to each other within each site (shown in  $\log_2$  in the figure, Methods). Solving this  
99 model with appropriate noise distributions for RP count data can be conveniently implemented  
100 as a generalized linear model (GLM), which models the expected read counts as gene specific  
101 fluxes (gene covariates) multiplied by ribosome DTs (codon covariates) (Methods). The GLM  
102 uses the 61 sense codon alphabet, and considered positions around the ribosome spanning 40

103 codons around the E site (Fig.S1A-B). The same model is also applied on RNA-seq experiments  
104 (when available) to normalize the fluxes per mRNA and attenuate possible technical biases  
105 affecting the ribosome DTs. While previous models can predict ribosome footprint densities  
106 [19, 36, 30, 20, 21], our approach stands out as it allows, in addition, to determine globally  
107 translation elongation parameters (single-codon and codon-pair DTs, and gene specific fluxes)  
108 directly from the raw reads counts at every position on the coding sequences (CDSs), using  
109 negative binomial noise model (Fig.S1C-E) (Methods).

### 110 **In yeast ribosome DTs anti-correlate with codon usage and show codon-pair** 111 **interactions**

112 To validate our model, we analyzed two published ribosome profiling datasets in *Saccharomyces*  
113 *cerevisiae* [25, 49], one under normal (WT) [49] conditions and one treated with 3-amino-1,2,4-  
114 triazol (3-AT), which inhibits the histidine (His) biosynthesis pathway [25] thereby reducing  
115 loaded His-tRNAs. Both datasets used cycloheximide (CHX) only in the lysis buffer. Our  
116 model reproduced raw RP read counts along the transcripts with similar accuracy as previous  
117 methods [19, 36, 30, 20, 21] in both WT and 3-AT conditions (Fig. S2A-B).

118 Interestingly, the estimated relative dwell times (DTs) contributions for most codons in WT  
119 exhibited a two-fold range at the three E, P, and A sites (Fig. 1A-B, left), with some marked  
120 slower outliers. For instance, one codon (CCG) for proline (Pro) was markedly slow in the A  
121 and P sites, as expected due to its inefficient peptide bond formation (Discussion). Note that  
122 although the other three Pro codons are not as extreme, they are still slower than the average  
123 codon. Then, arginine (Arg) showed long DTs in all three sites. In fact, some Arg codons also  
124 showed slightly longer DTs in the upstream sequence, highlighting possible interactions of this  
125 positively charged amino acid with the ribosome exit tunnel (Fig. S2C). On the other hand,  
126 codons for isoleucine (Ile), leucine (Leu), and valine (Val) were the fastest in the A site (Fig.  
127 1A-B, left).

128 As control, we found that the shortage of His in the 3-AT condition resulted in lengthened DTs  
129 in the P and A sites for both His codons (CAC and CAT) (Fig. 1A-B, right). Interestingly,  
130 outside the E, P, and A sites, DTs showed a dependency on His codons at around 30 nucleotides  
131 (positions 11 and 12) downstream of the P-site (Fig. S2C), reflecting queued ribosomes (disomes)  
132 behind His codons[25]. Moreover, the DTs also displayed signatures of technical biases. Notably,  
133 the high variation in DTs at position -4, coinciding with the most 5' nucleotide of the insert,  
134 was previously shown to reflect biases in library preparation (Fig. S2C) (reviewed in [50]).

135 To further validate the biological relevance of our DTs, we compared ribosome DTs in WT  
136 condition with codon usage weighted by mRNA translation levels, to take into account condition-  
137 specific demands in codons. Interestingly, we found high negative correlations ( $R^2 = 0.565$   
138 and  $R^2 = 0.495$ ) between the codon usage and the DTs at the P and A sites (Fig. 1C). This  
139 observation suggests an evolutionary pressure to enrich for fast codons in highly expressed genes,  
140 and conversely.

141 In addition to the single-codon DTs, we probed whether pairs of codons in the ribosome sites  
142 synergize by analyzing the interaction terms (E:P, P:A, and E:A) (Fig. S2D). We compared  
143 these predicted DTs with a GFP-reporter experiment in yeast probing for pairs of codons that  
144 inhibit translation [34]. Indeed, the experimentally determined inhibitory pairs exhibited long  
145 predicted DTs at the P and A, or E and P ribosome sites (Fig. 1D-E). While for these pairs  
146 the single-codon DTs were already long, the synergistic interaction terms clearly prolonged the  
147 DTs of the experimental inhibitory pairs (Fig. 1D-E). Interestingly, though the E:P and P:A  
148 interactions were not correlated overall, the inhibitory pairs stood out as showing large DT  
149 contributions in both the E:P and P:A (Fig. 1F). Globally the P:A interaction matrix was  
150 sparse and not highly structured, but revealed large values and spread for the pairs involving  
151 codons for Arg or Pro (Fig S2D). Moreover, the net DT contributions for the  $61^2$  codon pairs,  
152 computed by summing the effects (in logs) of single-codon and codon pair interactions, revealed  
153 Arg in most of the top 50 slowest pairs, making this amino acid potent at decreasing translation

154 elongation rate. Conversely, Val was contained in most of the fastest pairs.

155 Thus, modeling RP data can identify subtle properties of ribosome DTs, such as codon-specific  
156 and codon-pairs contributions, signatures of sequences outside of the E, P, and A sites, and  
157 library biases.

## 158 **Single-codon and codon-pair DTs in mouse liver cluster by amino acids**

159 Determinants of translation elongation are less studied in mammals. We and others have previ-  
160 ously shown that feeding/fasting cycles can regulate translation initiation in mouse liver [51], via  
161 well described mechanisms, notably through mTOR and GCN2 related nutrient sensor pathways  
162 (reviewed in [52]). Here, we aimed to extend this analysis to the level of DTs, in particular to  
163 assess whether perturbed amino acid pools during low nutrient availability can alter DTs. There-  
164 fore, we applied the above model to our previously 84 ribosome profiling samples harvested in  
165 WT and circadian clock deficient mice (*Bmal1* KO) every 2-4 h around the 24 h day, including  
166 four biological replicates. As for yeast, our model faithfully captured raw RP read counts along  
167 transcripts, as reflected by a previously used correlation metric (Fig. S3A-B). Remarkably, DTs  
168 were very stable across all samples, showing high biological reproducibility and no time or circa-  
169 dian clock-dependent changes (Fig. S3C-E). Therefore, for the following analyses, we averaged  
170 the DTs over all the 84 samples.

171 Patterns of DTs for the E, P, and A sites showed biologically significant codon and amino acid-  
172 specificity (Fig.S3C). DTs were strikingly different than in yeast and exhibited a larger dynamic  
173 range (Fig. 2A-B). In particular, the P and A sites revealed nearly 10-fold range in DTs be-  
174 tween the fastest and slowest codons, while DTs in the E site were more tightly distributed  
175 (Fig. 2A-B), presumably reflecting that the DTs are primarily sensitive to aminoacyl-tRNA  
176 availability (A site) and peptide bond formation (P-A sites). While DTs in the P and A site  
177 were overall more strongly correlated to each other than with the E site, DTs also showed clear  
178 site-specificity (Fig. 2A-B). For instance, the four codons for Gly had long DTs in the P site,

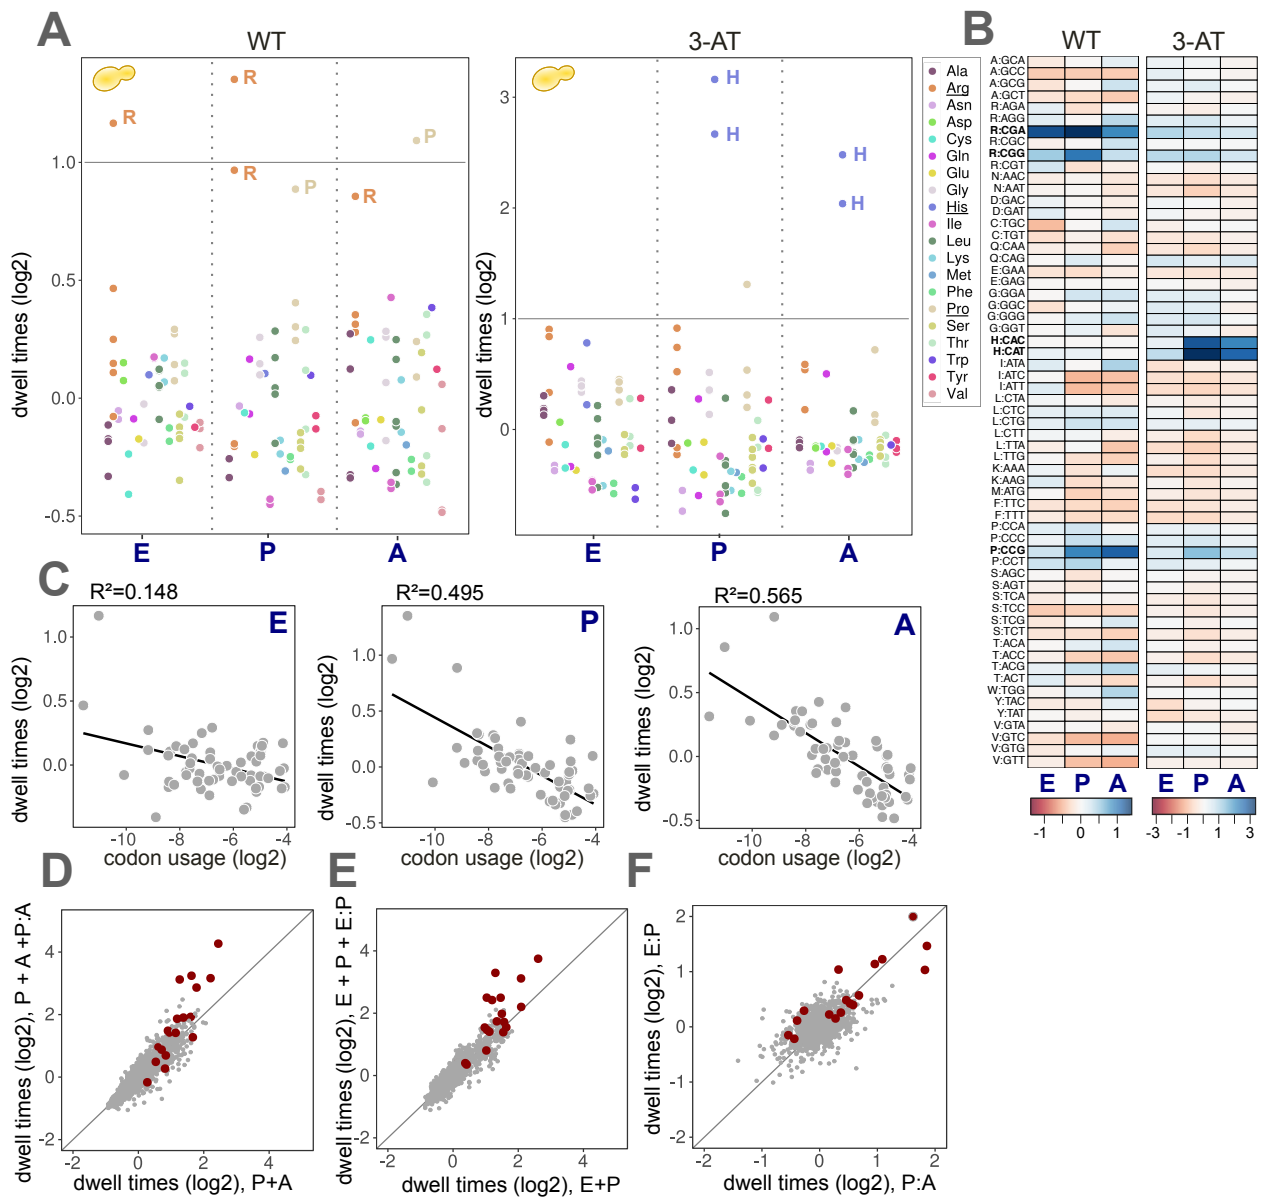

**Figure 1: In yeast, ribosome DT anticorrelate with codon usage and show codon-pair interactions**

Panels for the single-codon DTs are retrieved from the fit with the P:A interaction. **A**. DTs (log<sub>2</sub>, mean centered per site) for the 61 sense codons in the two conditions (WT/left, 3-AT/right) for the E, P, and A sites. Codons are colored according to amino acids. DTs with  $p \geq 0.05$  are not shown. Relatively fast and slow interactions are shown respectively in dark red and dark blue. **B**. Heatmap representation of panel (A). Here, DTs with  $p \geq 0.05$  are set to zero. **C**. Codon usage weighted by mRNA translation levels correlates with the codon DTs for the E, P, and A sites. Black line: linear fit. **D**. DTs (log<sub>2</sub>) for codon-pairs. Total codon-pair DTs (P+A+P:A, *i.e.* including the interactions P:A) versus the contributions from the single-codons (P+A). Red: Pairs described as inhibitory in [34]. **E**. DTs (log<sub>2</sub>) for codon pairs. Total codon-pair DTs (E+P+E:P, *i.e.* including the interactions E:P) versus the contributions from the single-codons (E+P). Red: Pairs described as inhibitory in [34]. **F**. P:A (log<sub>2</sub>) versus E:P (log<sub>2</sub>) interactions for all codon-pairs.



179 however, the Gly GGT codon was among the fastest in the E and A sites, while the GGA codon  
180 was markedly slow in the A site. Strikingly, all three Ile codons had long DTs in the A site  
181 but very short DTs in the P site (Fig. 2A-B). For the negatively charged glutamate (Glu) and  
182 aspartate (Asp), all their codons showed long DTs in the P and A sites (Fig. 2A-B). Considering  
183 a larger window around the ribosome revealed that P and A sites, followed by the E site, showed  
184 the largest contributions to DTs (Fig. S4A). Upstream and downstream sequences outside the  
185 (-4,+6) interval did not contribute (Fig. S4A), while codons in the vicinity of the ribosome (-3,  
186 -2, -1 and +3, +4, +5) exhibited significant variations in DTs, and were correlated between both  
187 sides. The detected signals at the -4 and +6 positions reflect known ligation biases during the  
188 library preparation [50].

189 Codon-pair DTs revealed a significant influence on translation elongation in mouse liver, with  
190 P:A interactions showing the widest dynamic range, followed by E:P and E:A (Fig. S4C). Note  
191 that the interaction matrices are not symmetric, showing codons or amino acid specificity at the  
192 respective ribosome sites (Fig. 2C and S4B). Intriguingly, the P:A matrix highlighted a striking  
193 clustering by amino acid for the A site (Fig. 2C), while E:P interactions clustered by amino  
194 acid in the P site (Fig. S4B). This suggests that P:A codon-pair DTs are determined by amino  
195 acids through their influence on the peptide bond formation. The clustering by amino acid was  
196 corroborated by a model selection analysis on the 84 samples, where the alphabet for the DT  
197 regression coefficients was taken as either the 20 natural amino acids, or the 61 sense codons  
198 (Fig. S4D). While the preferred alphabet was overall that of the codons, the model with amino  
199 acid coefficients at the A site for the P:A interaction was preferred to all the other models (Fig.  
200 S4D). In the case of the E:P interaction, the amino acid alphabet in the P site was considered  
201 as the best model. Overall, models including the site interactions were preferred to the reduced  
202 models, emphasizing the importance of codon-pair interactions in determining ribosome DTs in  
203 mouse liver. The P:A matrix revealed strong positive interactions (ones lengthening the DTs)  
204 for pairs of bulky (Pro, tryptophan (Trp) and phenylalanine (Phe)) or achiral (Gly) (Fig. 2C

205 and D) amino acids. As in yeast, Arg codons were frequent among large P:A contributions (Fig.  
206 2C and D). Surprisingly, the known stalling pair Pro-Pro showed the largest negative interaction  
207 (Fig. 2C and D), possibly related to eIF5A activity which is known to facilitate otherwise slow  
208 peptide bond formation for such pairs [53]. Overall, these interactions contributed to the total  
209 codon-pair DTs for the P and A site by a factor larger than 2 for about one hundred pairs (Fig.  
210 2D). Summing both single-codon and codon-pair contributions showed that the amino acid pair  
211 isoleucine-glycine was represented by multiple combinations of codons in the top ten overall  
212 slowest pairs (Fig. 2D). Similarly the leucine-leucine pair was frequent among the fastest codon  
213 pairs (Fig. 2D). The E:P matrix was more complex: pairs involving the amino acids Gly, Asp,  
214 Asparagine (Asn), and Pro in the P site lengthened the total codon-pair DTs (Fig. S4B).  
215 Unlike in yeast (Fig. 1C), ribosome DTs did not correlate with codon usage in mouse liver (Fig.  
216 2E), arguing for different evolutionary pressure on translation efficiency.

### 217 **Ribosome DT patterns in liver are stable under prolonged fasting**

218 The above analysis showed highly robust DTs between liver samples collected during the nor-  
219 mal feeding (night) / fasting (day) cycle (Figure S3C-E). To probe whether ribosome DTs are  
220 sensitive to longer periods of fasting, we performed new ribosome profiling experiments in mice  
221 fed either ad libitum (AL) or fasted (FA) for up to 30 hours (Fig. 3A). Since the enrichment  
222 in ribosome footprints can be sensitive to RP protocols [54], we here used a small RNA-Seq  
223 protocol with random adapters (UMI) to reduce possible ligation biases and PCR duplicates.  
224 Moreover, as ribosome dynamics and DTs are affected in ribosome profiling experiments with  
225 cycloheximide (CHX) in yeast [39, 55], we tested conditions without CHX in the lysis buffer.  
226 First, we validated the effect of prolonged fasting by analyzing differential ribosome profiling  
227 signals between AL and FA. Genes related to the Peroxisome Proliferator-Activated Receptor  $\alpha$   
228 (PPAR $\alpha$ ) pathway and to fatty acids oxidation were upregulated in FA, presumably to provide  
229 the energy needs (Fig. 3D). On the contrary, genes related to lipid biosynthesis were downregu-

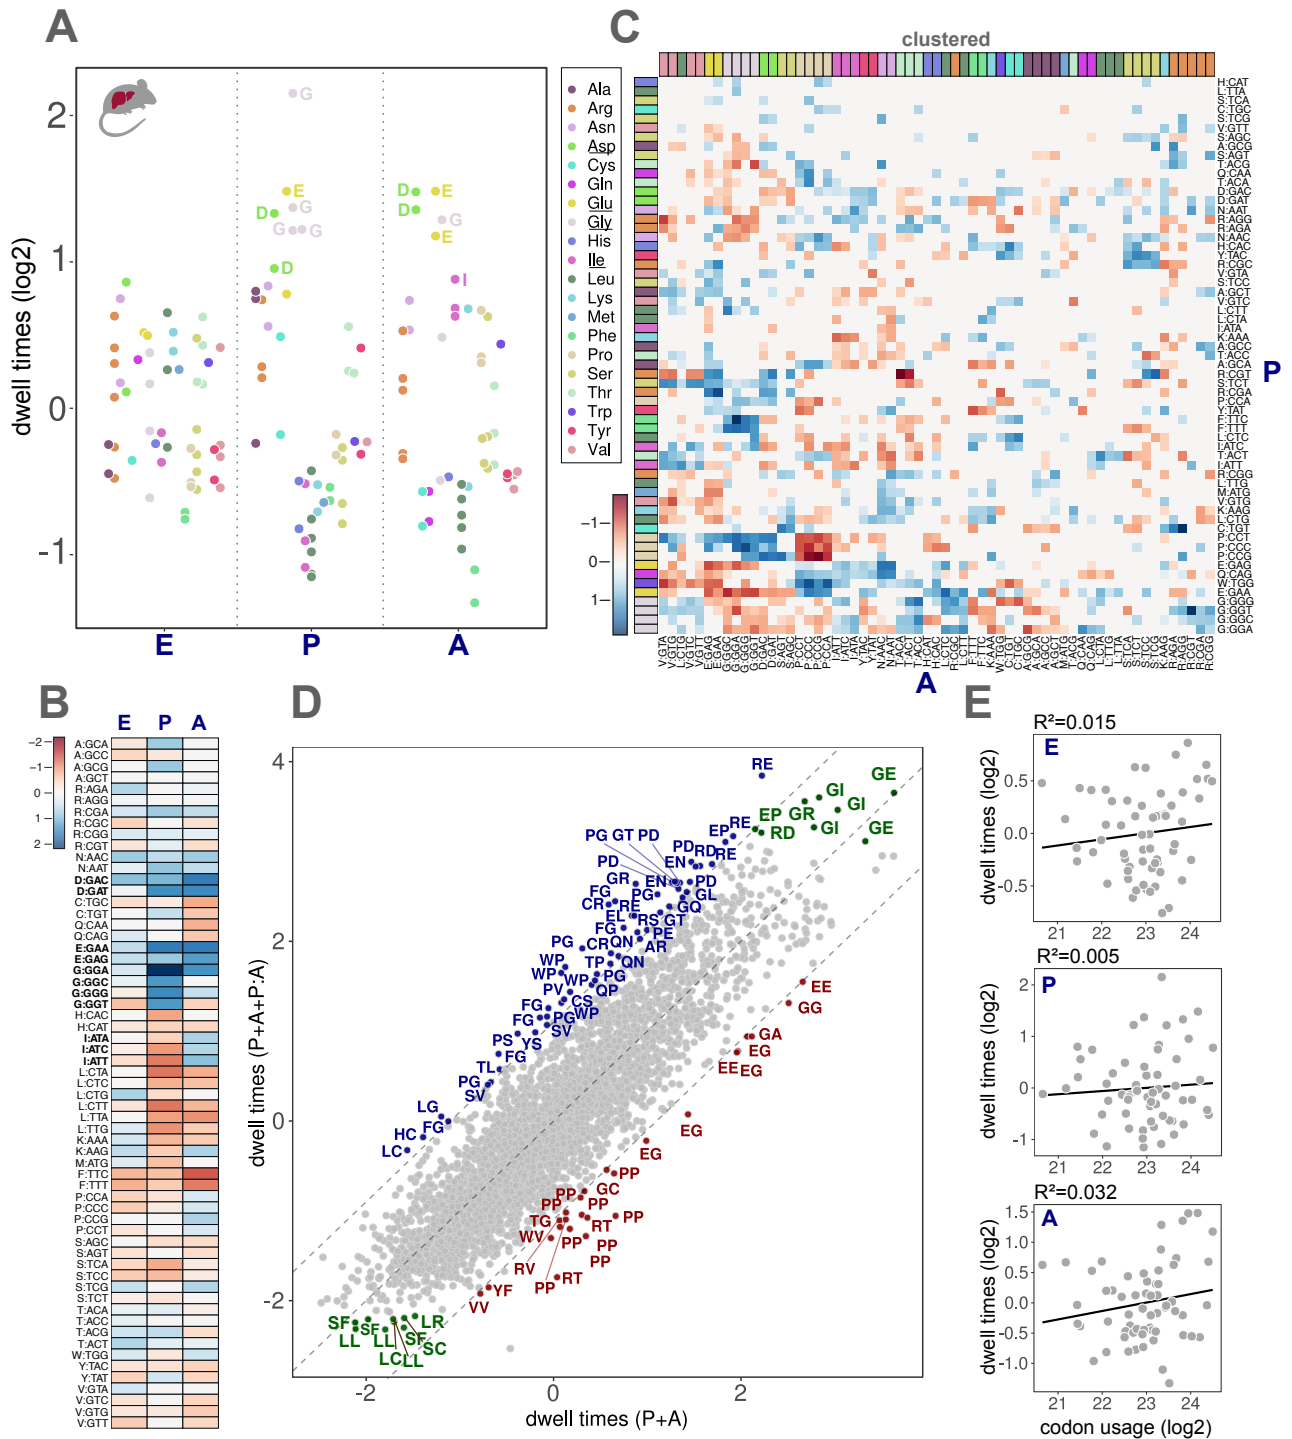

**Figure 2: Single-codon and codon-pair DTs in mouse liver cluster by amino acid**

Single-codon DTs are retrieved from the fit with the P:A interaction. A. DTs (log<sub>2</sub>, mean centered per site) for the E, P, and A sites averaged over the 84 samples in mouse liver. Codons are colored according to amino acids. DTs with  $p \geq 0.05$  are set to zero. Fast and slow DTs (relative to the mean) are shown in dark red and dark blue, respectively. B. Heatmap representation of panel A). DTs with  $p \geq 0.05$  are set to zero. C. Interaction matrix for the pairs P:A (log<sub>2</sub>). Codons are colored according to amino acids. Codons in both sites are hierarchically clustered (euclidean distance matrix, complete linkage algorithm). Fast and slow interactions are shown in dark red and dark blue, respectively (colorbar). D. DTs (log<sub>2</sub>) for codon pairs. Total codon-pair DTs (P+A+P:A, *i.e.* including the interactions P:A) vs. the contributions from the single-codons (P+A). Pairs with interactions  $> 1.1$  or  $< -1.1$  are annotated and colored, respectively, in blue and red. Top 10 slowest and fastest pairs are colored in green if not already depicted. E. Codon usage weighted by mRNA translation levels does not correlate with codon DTs for the E, P, and A sites. Black line: linear fit.

230 lated in FA (Fig. 3D), suggesting that animals switched from glucose to fatty acid metabolism in  
231 FA, as already described [56]. Moreover, *Mat1a*, *Asl* and *Got1* related to amino acid biosynthesis  
232 were upregulated in FA (Fig. 3D), presumably in response to perturbed amino acid homeostasis.  
233 The ribosome profiling data in the new conditions showed a typical tri-repeat nucleotide pattern  
234 (Fig. 3B), confirming the presence of *bona fide* translating ribosomes in the FA samples, as well  
235 as in samples without CHX (NOCHX). In addition, the modified library preparation improved  
236 the goodness of the fits. Indeed, correlation coefficients introduced above (Fig. S3A-B) were  
237 now improved (Fig. S5A-B).

238 Surprisingly, single-codon DTs in the AL and FA conditions showed no difference in both the  
239 CHX or NOCHX conditions (Figs. 3C and S5C), and codon-pair DTs very also very similar  
240 (Fig. S5D). Moreover, these DTs were highly correlated with those described above for the 84  
241 samples (Fig. S6C-D). Nevertheless, the FA samples showed a reduced dynamic range in the  
242 DTs, presumably due to variability in ribosome profiling signal quality (Fig. S5A) related to  
243 the global decrease in translation levels.

244 Finally, we probed whether the perturbed metabolic state in FA might lead to differential codon  
245 usage [24]. Strikingly, when considering the codon usage bias in WT and FA animals, we found  
246 that most of the codons with a G or C nucleotide at the third position (GC3) were enriched in  
247 up-regulated transcripts in FA, while codons with an A or T nucleotide were underrepresented  
248 (Fig. S5E).

## 249 **Meta-analysis reveals conserved ribosome DTs in mammals**

250 To further compare the estimated ribosome DTs, we analyzed published ribosome profiling  
251 datasets in mouse liver (H: Howard *et al.*) [57], mouse kidney (CS: Castelo-Szekely *et al.*) [58],  
252 and in the human liver cell line Huh7 (L: Lintner *et al.*) [59]. Despite differences in library  
253 preparation protocols (Methods), single-codon DTs at the A site were highly correlated between  
254 the mammalian datasets ( $0.48 < r < 0.96$ ), including in different tissues (kidney) and human

255 cells (Fig. S6C, E). However, the mammalian DTs were markedly different from those in yeast  
256 [19]. Note that the relative contribution to the DTs from the E, P, and A sites vs. that from  
257 surrounding sites, in particular at positions -4 and +6, differed significantly depending on the  
258 protocols (Fig. S6A-B). Similar potential biases have been reported previously [54]. Here, we  
259 found that protocols without cDNA circularization showed highest signals in the P and A sites,  
260 presumably reflecting ribosome dynamics more faithfully (Fig. S6A-B). Moreover, this was also  
261 reflected in the codon-pair DTs (P:A), which were more consistent across experiments with that  
262 protocol (Fig. S6D).

263 Together, this meta-analysis highlighted how different library preparations lead to damped RP  
264 signals in the A and P sites for some protocols, and showed that the codon DT patterns are  
265 conserved between mouse tissues and mammalian species.

### 266 **(Aminoacyl-) tRNA profiles are conserved in fed and fasted mice**

267 We next asked whether the estimated DTs can be linked with tRNA abundances or loading lev-  
268 els, which is poorly studied in higher eukaryotes [43]. The chemical modifications and secondary  
269 structure of tRNAs render them difficult to quantify. A recent hybridization method combined  
270 with sequencing, which controls specificity using left/right probes and a stringent ligation step,  
271 allows to bypass the cDNA synthesis to quantify tRNA levels [9]. To measure tRNA abun-  
272 dances and assess possible links with ribosome DTs in mouse liver, we adapted and optimized  
273 this method to target all annotated mouse tRNAs (Fig. S7A). Moreover, we quantified the  
274 fraction of (aminoacyl-) tRNAs using sodium periodate [60], which depletes unloaded tRNAs by  
275 selective biotinylation of 3'-ends (Fig. S7A). This way, we aimed to quantify the tRNA pools  
276 available for elongation in the ribosome A site.

277 tRNA molecules are encoded by a large number of genes. Therefore, we designed 303 DNA  
278 probe pairs (left and right) to target all mouse tRNA sequences from the *GtRNAdb* database  
279 [61] (Fig. S7A). Our modified protocol yielded a high proportion of specific ligations between

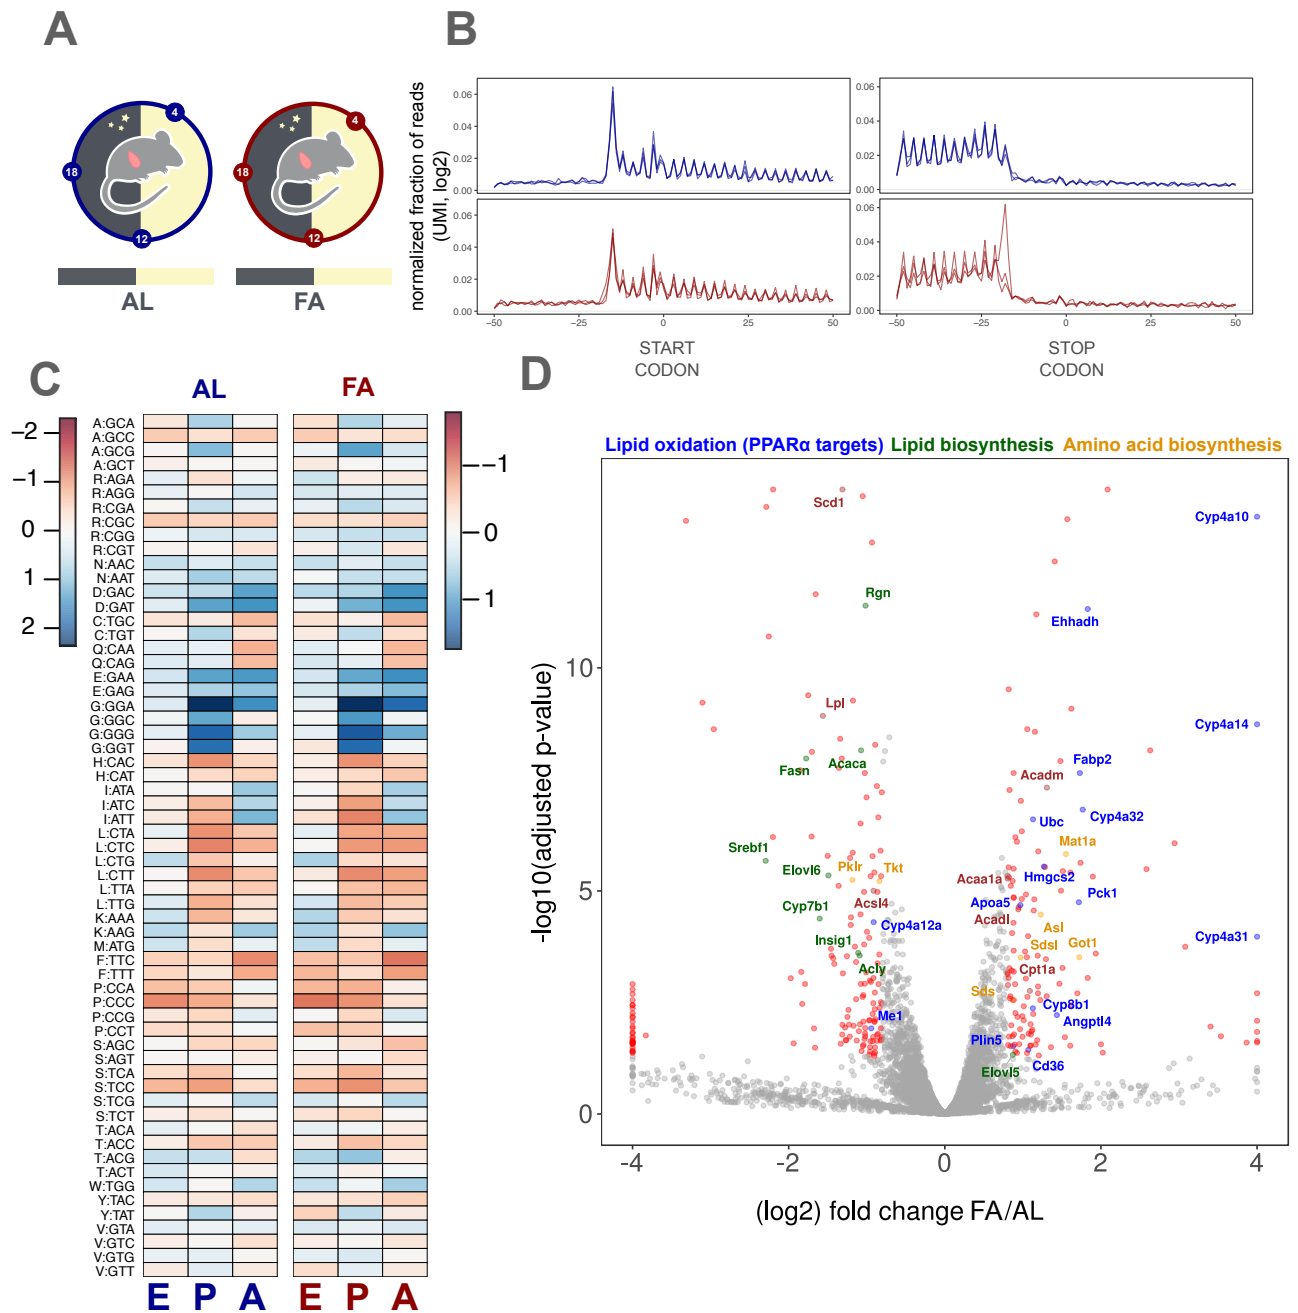

**Figure 3: Ribosome DTs are not affected in fasted mice and without cycloheximide**

Single-codon DTs are retrieved from the fit with the P:A interaction. A. Livers from mice fed AL or FA were harvested at ZT4, ZT12, and ZT18. Ribosome profiling was performed without cycloheximide (CHX) in the lysis buffer. B. Normalized fractions of reads of length 32 around the start and stop codons in a window of 100 nucleotides genome-wide. Dark blue: AL/NOCHX; dark red: FA/NOCHX. C. DTs ( $\log_2$ , mean centered per site, heatmap) for the E, P, and A sites in AL/NOCHX and FA/NOCHX. Codons are ordered by amino acid. Side bars:  $\log_2$  color scale. D. Differential expression of ribosome profiling signals between AL and FA (Methods). Benjamini-Hochberg adjusted p-values ( $-\log_{10}$ ) plotted against averaged  $\log_2$  fold change between FA and AL. Genes with false discovery rate (FDR) < 1% and absolute  $\log_2$  fold change > 1 are annotated and colored. Blue: genes in the KEGG "PPAR $\alpha$  signal pathway"; Green: KEGG and GO term "lipid biosynthesis"; Orange: KEGG "amino acid biosynthesis".

280 left and right probes, showing target specificity for tRNAs (Fig. S7B). Indeed, mapping of the  
281 sequencing reads to all possible combinations ( $303^2$ ) of left and right probes showed that more  
282 than 75% of ligated products belonged to tRNA genes of the same codon (Fig. S7B), and even  
283 95% were from probe pairs that could be assigned to specific codons with high confidence (Fig.  
284 S7B) (Methods). We performed further experiments to validate the specificity and evaluated  
285 the efficiency of DNA ligases (Fig. S7C-D).

286 We measured tRNA abundance on mouse livers from the same samples as those used for the ribo-  
287 some profiling. Specifically, we quantified the total tRNA (control, NaCl) and the (aminoacyl-)  
288 tRNA (sodium periodate, NaIO<sub>4</sub>) abundances from the same pieces of liver in two replicates in  
289 the AL and FA conditions, at three different times during the day (ZT04, ZT12, ZT18) (Fig. 4A,  
290 Methods). tRNA abundances were highly reproducible (Fig. S7E), exhibited a large dynamic  
291 range (Fig. 4B), and were significantly correlated with PolIII ChIP-Seq data in mouse liver [62]  
292 (Fig. S7F). tRNA levels for amino acids encoded by four synonymous codons ("4-codon" box)  
293 were represented by one dominant highly expressed isoacceptor with a T at the wobble position  
294 34 (*e.g.* TGC/Ala, TGG/Pro, TCC/Gly, TAC/Val, TGT/Thr) (Fig. S8A). The tRNA levels  
295 showed only small variations over the biological conditions, except for mitochondrial tRNAs  
296 (Fig. S8B). Strikingly though, principal component analysis (PCA) on the four conditions (*i.e.*  
297 NaCl/AL, NaCl/FA, NaIO<sub>4</sub>/AL and NaIO<sub>4</sub>/FA) showed a clear separation between the control  
298 and periodate conditions (Fig. 4C), indicating differential loading of the tRNAs. Surprisingly,  
299 the AL and FA samples were indistinguishable in the total tRNA and (aminoacyl-) tRNA condi-  
300 tions (Fig. 4C-D), indicating no imbalance of tRNA charging in prolonged fasting and coinciding  
301 with the stable DTs.

302 However, some codons for Asn, Asp, and Ile were lowly aminoacylated, independently of the  
303 feeding regime (Figs. 4D, S8C). Strikingly, these same codons were found to exhibit the slowest  
304 DTs in the A site (Fig. 2).



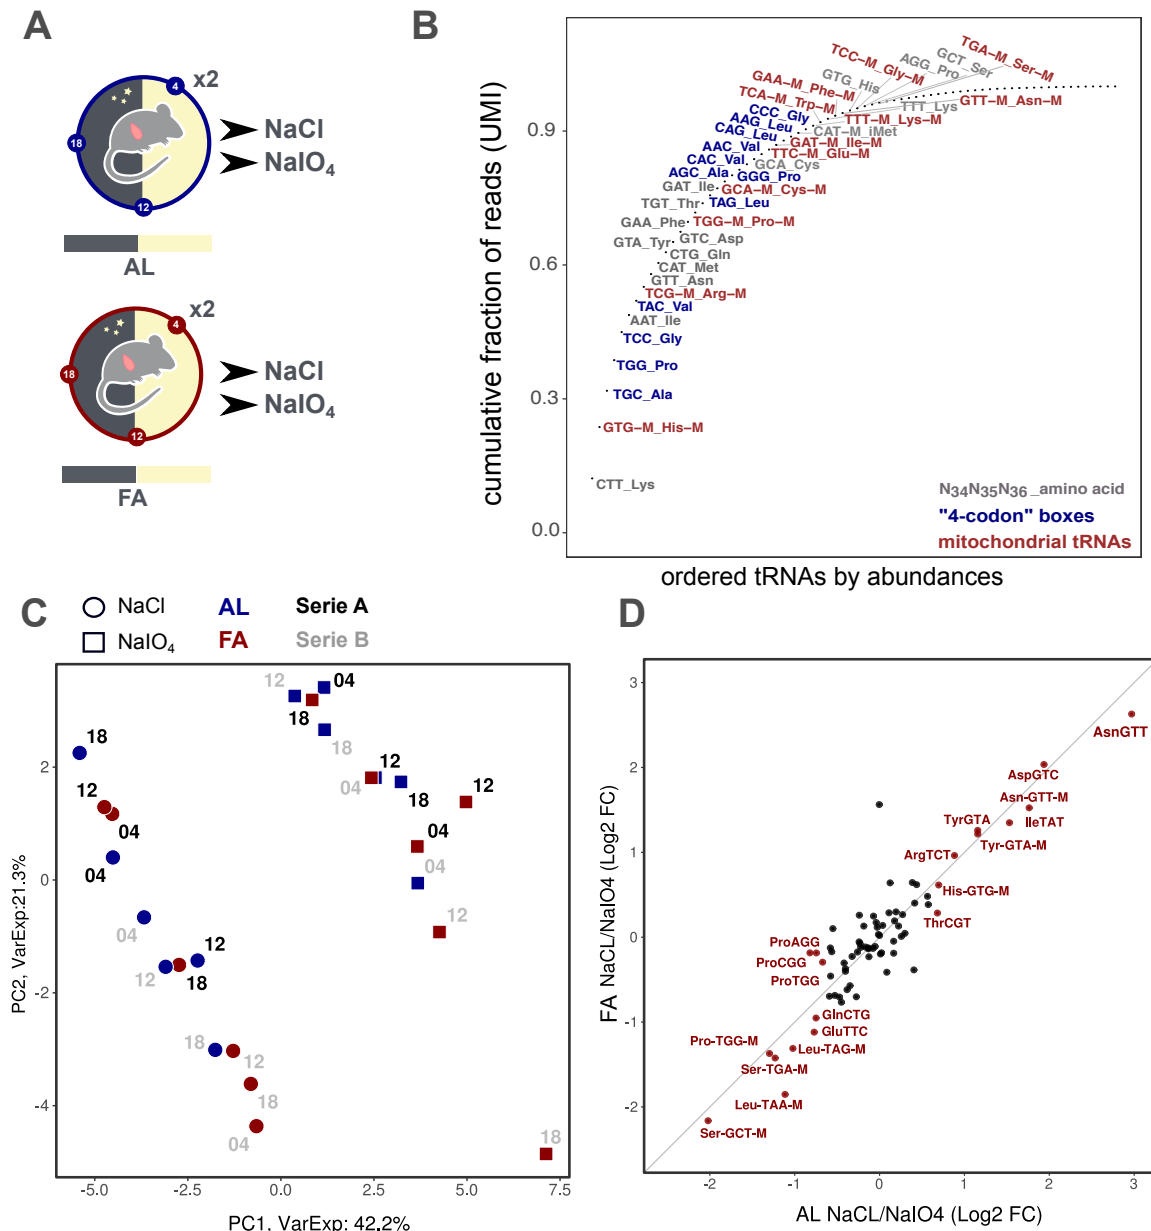

Figure 4: (Aminoacyl-) tRNA profiling in AL fed and FA mice

A. Mice fed AL or FA were sacrificed at ZT4 (fasting duration: 16 h), ZT12 (24 h) and ZT18 (30 h) and livers were harvested. Each sample was treated with NaCl and sodium periodate (NaIO<sub>4</sub>). B. Cumulative fraction of reads for each tRNA, ordered by abundances. Anticodons and amino acids are indicated for the 50 first codons. Blue: four-codon box amino acid; red: mitochondrial tRNAs. C. PCA of the tRNA abundances (log<sub>2</sub> UMI). PC1 and PC2 explain 42.2% and 21.3% of the variance, respectively, and separate NaCl from NaIO<sub>4</sub> treatment. NaCl (circle), NaIO<sub>4</sub> (square), AL (blue), FA (red), replicate 1 (black), replicate 2 (grey). ZT is shown beside the points. D. Ratio of tRNA abundances (log<sub>2</sub> fold change, averaged over the time points) between the NaCl and NaIO<sub>4</sub> for AL fed vs. FA mice (significant changes,  $p < 0.05$  in red). No tRNA showed a significant difference between AL and FA (*i.e.* fell out of the diagonal).



## 305 Relationship between (aminoacyl-) tRNA levels, codon usage, and dwell times

306 To substantiate this observation, we investigated whether variations of single-codon DTs and  
307 codon usage could be explained by the available tRNA pools. Here, our data showed a significant  
308 correlation between codon usage and our measured tRNA levels in mouse liver (Fig. 5A),  
309 extending previous work using POLIII loadings on tRNA genes as proxies [63]. Our analysis  
310 also highlighted codons with high or low demand (codon usage) compared to the supply (tRNA  
311 levels), as quantified by the *codon balance* [64] (Fig. 5A).

312 Some codons with the slowest DTs in the A site clearly stood out as having either low codon  
313 balance or aminoacylation levels. In fact, DTs in the A site did not exhibit a simple correlation  
314 with tRNA abundances (Fig. 5B), nor with the codon balance (Fig. 5C). However, the slow DTs  
315 for Glu codons (Fig. 5C) may well result from their low codon balance, hence limiting tRNA  
316 availability at the A site. Remarkably, codons for Asp, Asn, and Ile, which had particularly  
317 lowly charged tRNAs, coincided with some of the slowest DTs in the A site (Fig. 5D). However,  
318 DTs in the A site were overall uncorrelated with tRNA aminoacylation levels. We therefore  
319 included several effects in a linear model, which uncovered that a linear combination of tRNA  
320 aminoacylation levels and codon balance captures a significant portion of variation in the A site  
321 DTs, particularly the long DTs for Glu, Asp, Asn, and Ile codons (Fig. 5E).

322

## 323 Discussion

324 We extensively modeled RP datasets and uncovered single-codon and codon-pair DTs determin-  
325 ing ribosome elongation rates in mammals. These DTs were highly stable across all conditions  
326 tested. In parallel, we quantified (aminoacyl-) tRNA levels in mouse liver and identified several  
327 features regulating ribosome elongation, such as aminoacylation levels and the balance between  
328 tRNA levels and codon usage.

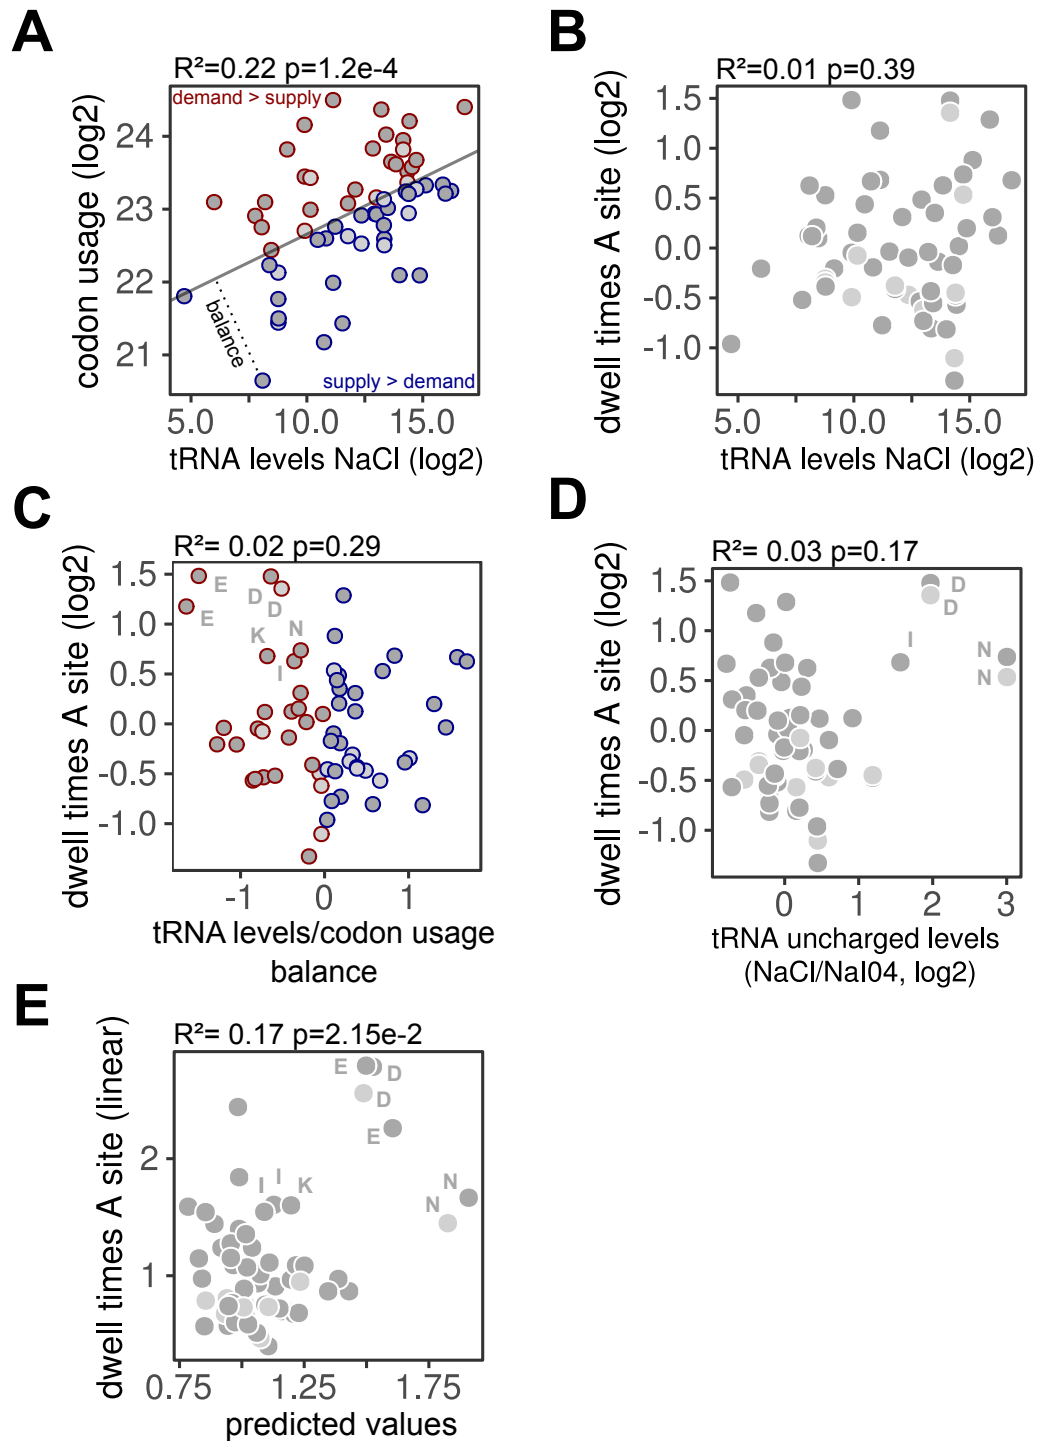

**Figure 5: Relationship between (aminoacyl-) tRNA levels, codon usage and DT**

A. Significant correlation ( $R^2 = 0.22$ ,  $p = 1.2e - 4$ ) between codon usage weighted by mRNA translation levels (wCU, log2) and normalized total tRNA (NaCl) read count for each codon (log2, UMI, averaged over the AL samples). The gray line shows the first principal component (PC). Orthogonal distance to the PC reflects the balance between tRNA supply and demand. Codons with positive (resp. negative) balance are colored blue (resp. red). Codons are assigned to their canonical tRNAs (dark-grey) or to wobble tRNAs (light-grey) where appropriate (Methods). B. DTs in the A site (log2) vs. tRNA levels (NaCl, log2) averaged over the AL samples ( $R^2 = 0.01$ , p-value=  $3.9e - 1$ ). C. Correlation between tRNA levels/codon usage balance and DTs in the A site (log2) averaged over the AL samples.  $R^2$  and p-value are reported for the linear regression ( $R^2 = 0.02$ , p-value=  $2.9e - 1$ ). D. Correlation between tRNA uncharged levels (NaCl/NaI04, log2) and DTs in the A site (log2) averaged over the AL samples.  $R^2$  and p-value are reported for the linear regression ( $R^2 = 0.03$ , p-value=  $1.7e - 1$ ). Positively correlated codons are annotated by their one-letter amino acid. E. Significant correlation ( $R^2 = 0.17$ , p-value=  $2.15e - 02$ ) between estimated and predicted DTs in the A site. Prediction uses a linear model with the balance and uncharged levels, in linear scale, as explanatory variables. In C-E, annotations refer to one-letter amino acid.

329

330 In yeast, our model accurately inferred codon-specific DTs and highlighted mainly Arg and  
331 Pro as slow in the A and P sites. These amino acids are known for their inefficient peptide  
332 formation and sterical interactions with the ribosome [65, 66]. A significant negative correla-  
333 tion was observed between DTs and codon usage, reflecting natural selection for fast codons  
334 in highly translated genes. While this relationship has been described [67, 36], the found cor-  
335 relation is, to our knowledge, the highest reported. Moreover, our analysis confirmed recently  
336 identified inhibitory pairs [34], and deciphered their synergistic effect in addition to the site-  
337 specific contributions. We showed that the inhibitory pairs lengthened DTs both in the E:P  
338 and P:A positions, highlighting potentially inefficient translocation of the pair due to wobble  
339 base-pairing or other mechanisms [34].

340

341 In mouse liver, DTs differed significantly from yeast, showing a larger spread and higher  
342 complexity. Remarkably, DTs were very similar between different tissues, species, and RP pro-  
343 tocols. Moreover, the DTs were consistent with a peptide motif enriched in stalled ribosome  
344 sites in mouse embryonic stem cells (mESCs) [68].

345

346 We found that the smallest and achiral amino acid Gly exhibited very long DTs (in the  
347 A and P site) with different magnitudes between the isoacceptors and tissues (*i.e.* liver and  
348 kidney). Interestingly, in bacteria, Gly codons are slow, although this effect is still difficult  
349 to separate from Shine-Dalgarno (SD) dependent stalling [69] or protocol artifacts [70], and is  
350 therefore debated [71]. As mammals do not use a SD mechanism, our result support an alterna-  
351 tive hypothesis, such as slow codon-anticodon pairing [72] or inefficient peptide bond formation.  
352 Pioneering work in *E. coli* suggested that Gly-tRNAs adopt a particular conformation due to  
353 the U nucleotide in position 32 and that unmodified  $U_{34}$  on  $tRNA_{UCC}^{Gly}$  could decode the four  
354 Gly codons (a pairing known as superwobbling [73]), but with low efficiency (reviewed in [72]).

355 While this mechanism was shown in unicellular organisms, our tRNA profiling found  $tRNA_{UCC}^{Gly}$   
356 as the major Gly isoacceptors and one of the most abundant tRNAs in mouse liver. Further  
357 work may indicate whether superwobbling occurs in the liver.

358

359 The DTs for the acidic amino acids (Asp and Glu) were among the slowest. Glu showed a  
360 particularly low balance of tRNA levels/codon usage and Asp tRNA was lowly charged. This  
361 could lead to a shortage of tRNA availability and ribosome stalling [23]. As their codons share  
362 the same first two bases, competition with near-cognate tRNAs [27], or pairing inefficiency due  
363 to the wobble mechanism could also explain the long DTs. Indeed, slower elongation would  
364 allow higher precision in codon-anticodon discrimination [74].

365

366 Ile codon DTs were slow in the A site while fast in the P site. Remarkably, the isomeric Leu  
367 codons were the fastest in the P and A sites, highlighting a structure-independent mechanism.  
368 Indeed, we showed that Ile-tRNAs were lowly aminoacylated, reducing Ile availability on the  
369 A site, but other explanations are possible. For instance, since Ile is decoded by three differ-  
370 ent codons, a suitable pairing mechanism such as inosine or other U34 modifications could be  
371 used to avoid pairing of the fourth near-cognate codon (Met) and therefore increase the DTs [75].

372

373 One of our main findings concerned the contributions of codon-pair interactions towards  
374 DTs, mainly at the P and A site. At these positions, the ribosome catalyzes the peptide bond  
375 formation between (aminoacyl-) tRNA in the A site and peptide-tRNA bound to the P site.  
376 Our analysis revealed that the identity of the amino acid in the A site (acceptor), and not  
377 the codon, was the best descriptor of those codon pair interactions. Pairs including bulky  
378 amino acids or Gly in the A site were slow, highlighting their potential inefficiency in peptide  
379 bond formation. Interestingly the DT for Pro-Pro pairs, known to inefficiently form peptide  
380 bonds [76], was markedly reduced by the interaction. This observation probably shows the role

381 of eIF5A in resolving this stalling motif. On the other hand, Gly, Asp, and Glu, which were  
382 slow in our analysis, were shown by others to require eIF5A for their efficient translation [77, 78].

383

384 Other features not included in the model, and which are independent of the codon iden-  
385 tity, might regulate ribosome elongation. A high number of liver proteins are secreted and  
386 thereby translated by ribosomes bound to the endoplasmic reticulum via the interaction of sig-  
387 nal recognition particles with the nascent peptide chain. These interactions are known to stall  
388 the ribosomes, however, as these appear to be codon independent, we did not detect them in our  
389 analysis [30]. In addition, chaperone proteins interacting with the nascent peptide can influence  
390 co-translational folding and subsequent ribosome density on mRNAs [79]. The model could also  
391 be further extended by including RNA secondary structure and modifications, pseudo-knots  
392 acting as ribosome roadblocks, and slippery sequences inducing frame shifting [30, 20, 80, 81].  
393 Recent studies have described ribosome collisions and their relationships with recruitment of  
394 ribosome quality control and degradation pathways [82, 83]. While these events could happen  
395 frequently in liver, and thereby bias position-dependent estimation of DTs from standard ribo-  
396 some profiling, a recent study probing the determinants of collided ribosomes in mouse liver  
397 showed similar codon dependencies between pausing sites and our DTs [84].

398

399 While we found a striking correlation between DTs and codon usage in yeast, the same did  
400 not hold in mammals. This suggests that biased codon usage in mammals reflects more complex  
401 evolutionary forces, such as mutation driven GC bias [63]. Nevertheless, the measured tRNA  
402 abundances showed signatures of adaptation, since tRNA levels correlated with the codon us-  
403 age. These correlations extended previous results at the transcription level or in highly expressed  
404 genes [63, 85]. Related to this, one still open challenge is to assign tRNAs to their corresponding  
405 codons, due to the extended wobble base pairing rules related to tRNA modifications.

406

407 Surprisingly, tRNA loading was unaffected by prolonged fasting. Several studies in cell lines  
408 showed that decreasing amino acids in culture media leads to decreased (aminoacyl-) tRNA  
409 availability and therefore increases ribosome stalling [60, 23]. Moreover, others have shown that  
410 codon optimality contributes to differential mRNA translation in response to starvation [24].  
411 While we did not observe this, probably due to the *in vivo* state, GC3 bias (*i.e.* GC bias at  
412 position N3 in codons) was significantly different between genes translated in AL and FA mice  
413 (Fig. S5E) or also between night and day conditions (not shown). Genes with high GC3 content  
414 have been shown to provide more targets for methylation than those with low GC3 and to be  
415 enriched in stress responsive genes [86]. Oxidative stress occurs during fasting/day in mouse and  
416 correlates with GC3 content. Nevertheless, the reason of the higher GC3 level in FA compared  
417 to AL still needs to be identified.

418

419 Like (aminoacyl-) tRNA levels, DTs were unchanged between AL and FA. We can hypoth-  
420 esize that after more than 30 hours of starvation, mice compensate the lack of amino acids by  
421 a large global decrease of translation initiation through mTORC1/GCN2 [87], making tRNA  
422 availability and translation elongation non limiting. Moreover, since ribosome profiling signals,  
423 DTs, and tRNAs were measured in relative and not absolute amounts, we cannot exclude a total  
424 decrease of translation elongation rate, aminoacylation, or tRNA levels.

425

426 In conclusion, ribosome DTs, codon usage, tRNA levels, and translation elongation in mam-  
427 mals do not obey simple relationships. Nevertheless, although a global understanding is still  
428 missing, we were able to link both tRNA/codon usage balance and aminoacylation levels with  
429 anomalously slow DTs in the P and A site of the ribosome. Probing different ribosome states  
430 (*e.g.* free A site) using RP combined with different drugs [70] or improving the quantification of  
431 (aminoacyl-) tRNA through nucleotide modification removal [45] will lead to better understand-  
432 ing of the determinants of translation elongation. Finally, more work is needed to understand the

433 consequences of changes in ribosome elongation rates for mRNA stability and nascent protein  
434 folding.

## 435 **Methods**

### 436 **Inference of dwell times and translation fluxes**

#### 437 **Preprocessing of ribosome profiling data**

438 RP datasets from yeast, mouse, and human were respectively mapped on the sacCer3, mm10 and  
439 Hg38 genomes using STAR [88] with parameters `-seedSearchStartLmax 15`. Genomes indexes  
440 were built using Ensembl transcripts annotations. Adapters were retrieved for the different  
441 datasets and input as parameter for STAR. In the case of NEXTFlex library, fastqs files were  
442 parsed and duplicated sequences (UMI and insert) are removed. Sequences were trimmed for  
443 adapters using `fastx_clipper` with parameters `-Q33 -a TGG AATTCTCGGGTGCCAAGG -l 11` and  
444 UMIs are removed (4 nucleotides on both sides). Then, the fastq files are mapped using STAR  
445 with options `-seedSearchStartLmax 15`. The subsequence BAM files were sorted and indexed.

#### 446 **Read counting on the coding sequences**

447 For each protein coding transcript with a CDS larger than 120 nucleotides, reads with zero  
448 mismatches, unique mapping (`nM:i:0 & NH:i:1`) and a length between 25 and 40 nucleotides  
449 were retrieved using `samtools view` in the respective region. E site position was defined, for  
450 each read size, in function of the frame on the CDS and pileup plots at the start codon. From  
451 the E site position, the sequence in the window `[-60,+60]` nts was reported and incremented by  
452 one at each new observation. Sequences with a window spanning the start or stop codon were  
453 removed.

## 454 **Data filtering**

455 A sliding window of 120 nucleotides moving 3 by 3 on the CDS of protein coding genes were  
456 computed and the respective sequences were reported (Figure S1D). This set of sequences is used  
457 as a reference and their respective number of counts is set to zero. Every time a read occurs at  
458 one of these sequences, we incremented the count by one (Fig.S1D). Genes with less than 5%  
459 of positions covered or less than 5 positions observed were discarded. Genes with less than 100  
460 counts were removed. Sequences containing a stop codon (TAG, TGA, or TAA) or non-unique  
461 in the coding genome were discarded. Depending on the sample coverage, we monitored about  
462 5000 genes in mammals.

## 463 **Generalized linear model for ribosome profiling count data**

464 We used a generalized linear model for the observed RP read counts at the different positions  
465 on the gene CDS. Here, the read counts  $Y_{igs}$  at a specific codon position  $i$  corresponding to the  
466 ribosome E site on the CDS of a gene  $g$  in sample  $s$  were modeled as a negative binomial (NB)  
467 (*i.e.* commonly used for overdispersed count data [89]) with mean  $\mu_{igs}$  and dispersion parameter  
468  $\theta_s$ .

$$\begin{aligned} Y_{igs} &\sim NB(\mu_{igs}, \theta) \\ E[Y_{igs}] &= \mu_{igs} \\ \text{Var}(Y_{igs}) &= \mu_{igs} + \frac{\mu_{igs}^2}{\theta_s} \end{aligned} \tag{1}$$



469 The mean is further modeled as follows (omitting the sample index) :

$$h(\mu_{i,g}) = \underbrace{f_g}_{\text{gene}} + \left( \sum_{k=-20}^{20} \underbrace{\tau_{k,c(i+k)}^{(1)}}_{\text{single}} \right) + \underbrace{\tau_{c(i+s_1),c(i+s_2)}^{(2)}}_{\text{pairs}} + \text{offset}(\text{library size and/or RNA-Seq})$$

$$\text{with}(s_1, s_2) \in \begin{cases} (0, 1) \text{ for the E:P fit} \\ (0, 2) \text{ for the E:A fit} \\ (1, 2) \text{ for the P:A fit} \end{cases} \quad (2)$$

470 Here,  $c(i) \in \{AAA, AAC, AAG, \dots, TTT\}$ .  $h(x) = \log(x)$  the so-called link function that allows  
471 to express the product of gene flux and DTs (equal to the expected RP density) as a sum in  
472 log-space.  $\tau_{k,c(k)}^{(1)}$  denote the contributions of single-codon DTs (in log scale) for the 61 sense  
473 codons at position  $k$ , with  $k$  the position relative to the ribosome E site.  $\tau_{c(i+s_1),c(i+s_2)}^{(2)}$  denote  
474 the contributions of codon pair DTs (again in log scale) for the  $61^2$  pairs of sense codons at  
475 positions  $(s_1, s_2)$  relative to the ribosome E site. These codon pair matrices are modeled for the  
476 sites E:A, E:P, and P:A.  $f_g$  is the gene-specific translation flux (in log scale). Note that since  
477 this problem does not have full rank, we must choose some constraints, which means that the  
478 fit DTs are *relative* contributions. Here we chose to express these contributions relative to the  
479 mean for each site. Specifically, we apply the convention:  $\sum_c \tau_{k,c}^{(1)} = 0$  for all  $k$ ,  $\sum_c \tau_{c,c'}^{(2)} = 0$   
480 for all  $c'$ , and  $\sum_{c'} \tau_{c,c'}^{(2)} = 0$  for all  $c$  and shifted the gene fluxes accordingly. The offset term(s)  
481 make the gene fluxes normalized by library size. In addition, when specified in the text, we  
482 normalized gene translation fluxes by mRNA abundance by fitting the same model to RNA-seq  
483 data (the DTs then represent sequencing-dependent biases). From the RNA model we predicted  
484 the expected gene-specific RNA abundance and used it as an offset term.

485 In all figures showing DTs, point estimates as returned by *glm4* and relatively expressed in log  
486 are plotted. The reproducibility of those point estimate accross biological samples is shown in  
487 Fig. S3C.

488

489 *Negative binomial (NB) noise model.*  $\theta_s$  was taken as a sample specific parameter and was  
490 empirically estimated from the variance-mean relationship expected for a NB. Specifically, for  
491 each gene we used pairs of adjacent codons occurring more than once, the rationale being that  
492 according to our steady-state model, the counts observed on the multiple instances behave as  
493 replicates (i.e. the counts are sampled from the same NB). For those pairs of codons, we com-  
494 puted the respective mean and variance of counts and since we assumed that  $\theta_s$  only depends  
495 on the sample, we then estimated  $\theta_s$  globally (from all pairs on all genes) by linear regression  
496 using Eq.1 (Fig.S1 E). The fit was performed using the *glm4()* function from the R package  
497 *MatrixModels* with the noise family *negative.binomial( $\theta_s$ )* from the *MASS* package and with  
498 sparse design matrix option. Sequencing library size is used as an offset. RNA-Seq data is fitted  
499 (when available) and read counts are then predicted at every positions and used as an offset.

500

## 501 **Differential expression in *ad libitum* fed vs. fasted mice**

502 Two outlier samples (ZT12/FA/CHX and ZT04/FA/NOCHX) were excluded for the differential  
503 expression analysis and DT modelling. Statistics were computed using EdgeR [90] comparing  
504 a model including factors for time, feeding, and drug conditions against a model without the  
505 feeding term.

## 506 **Animal experiments**

507 Animal studies were approved by the local ethics committee, and all protocols were approved  
508 by the Service Vétérinaire Cantonal (Lausanne, Switzerland) under license VD3613. 8 weeks  
509 old male C57BL6/J mice (Charles River Laboratory) are kept under diurnal lighting conditions  
510 (12-h light, 12-h dark) at a temperature of 21 °C +/- 2 °C. After a complete night of fasting,  
511 the mice were kept without access to food for an additional period of up to 24 hours. During

512 this time period animals were sacrificed every 8 hours starting at ZT4. Control animals were  
513 kept on *ad libitum* feeding regimen.

## 514 **Ribosome profiling**

515 Samples preparation for RP was performed as described in [51] except for the conditions without  
516 cycloheximide (CHX) in which fresh livers were directly lysed in ice-cold lysis buffer without  
517 CHX and directly flash-frozen in liquid nitrogen. To limit possible bias due to footprint size  
518 selection related to different conformations of the ribosome [69] [38], a larger band was cut on  
519 the TBE-gel. Libraries were generated using NEXTflex Small RNA Sequencing Kit v3 (bioo  
520 scientific) following the manufacturer's protocol. Samples were pooled based on the Illumina  
521 indices used. Denaturated pools were spiked with 5% PhiX and clustered (loading equivalent  
522 to 3 samples per lane) onto a rapid single-end v2 flowcells at a concentration of 8pM. Libraries  
523 were sequenced on a HiSeq 2500 (Illumina) for 50 cycles.

## 524 **(Aminoacyl-) tRNA profiling**

525 The tRNA profiling protocol was adapted and modified from [9]. We tested the initial protocol  
526 [9] on mouse liver samples but the results showed a high proportion of unspecific ligations  
527 between the left and right probes from distinct tRNAs. We solved this issue by inverting the  
528 order of two steps in the protocol: we performed the pull-down and cleaning on magnetic beads  
529 before the splint ligation between the two DNA probes on the tRNA (Fig. S7A). Oxidation  
530 of 3'-tRNA by periodate was adapted from [60]. All the steps were performed under cold and  
531 acidic conditions to avoid deacylation of the tRNAs before Na periodate oxidation.

## 532 **Probe Design**

533 DNA probes were designed to target all the annotated mouse tRNAs from [http://gtrnadb.  
534 ucsc.edu/](http://gtrnadb.ucsc.edu/). The database contains tRNA gene predictions by tRNAscan-SE [61]. tRNA se-  
535 quences for *Mus musculus* (GRCm38/mm10) were downloaded and spliced *in silico*. The se-

536 quences were split in the middle of the anticodon in order to design left and right probes. After  
537 reverse complementation of the sequences, overhangs (for PCR primer binding) and unique  
538 molecular identifiers (UMIs, 2x6N) were added (right-probe adapter:  
539 5'-GCACCCGAGAATTCCANNNNNNTGG-3, left-probe adapter:  
540 5'-NNNNNNGATCGTCGGACTGTAGAACTC-3'). Left probes were ordered with a 5'-phosphate  
541 to allow ligation with the right probe upon annealing with the corresponding tRNA. The ran-  
542 dom nucleotides were ordered as «high fidelity wobble »to ensure homogeneous representation  
543 of the four bases in the UMI and to avoid bias. DNA probes were ordered at MicroSynth AG  
544 (Switzerland).

#### 545 **tRNA extraction and oxidation**

546 50-100 mg of frozen mouse liver tissues were weighted under cold conditions. Beating beads  
547 were added and the samples were homogenized in 350  $\mu$ l of cold Qiazol (Qiagen) lysis reagent in  
548 a TissueLyser (Qiagen) for 2 x 2 min at 20 Hz. Tubes were left 5 min at room temperature. 140  
549  $\mu$ l of  $CHCl_3$  was added and homogenates were shaken vigorously followed by centrifugation at  
550 4°C for 15 min (12'000 x g). The upper aqueous phase was carefully removed and 1 volume (350  
551  $\mu$ l) of buffered phenol (Phenol:chloroform:isoamyl alcohol, 25:24:1, pH 4.9) was added. Samples  
552 were mixed and centrifuged for 15 minutes at 4°C (12'000 x g). Upper phase (300  $\mu$ l) was  
553 supplemented with 1 volume (300  $\mu$ l) of cold isopropanol, precipitated 30 minutes at 4°C and  
554 then centrifuged for 15 minutes at 4°C (12'000 x g). RNA pellets were dried at room temperature  
555 and re-suspended in 500  $\mu$ l of Sodium Acetate buffer pH 4.9 (0.2M). Samples were split in two  
556 tubes (2 x 250 $\mu$ l) for sodium periodate oxidation ( $NaIO_4$ ) or control ( $NaCl$ ) treatment. 50  $\mu$ l of  
557  $NaCl$  (0.3M) or  $NaIO_4$  (0.3M) was added and samples were incubated for 30 minutes at room  
558 temperature. The reaction was then supplemented with 300  $\mu$ l Ethanol (70%) and loaded on  
559 a miRNeasy column (Qiagen). tRNA were extracted following the miRNA easy protocol from  
560 Qiagen. 390  $\mu$ l Ethanol (100%) was added to the flow through and loaded on a MinElute column

561 (Qiagen). Columns were washed following the manufacturer's protocol and RNAs were eluted  
562 in 15  $\mu$ l RNase-free  $H_2O$ .

### 563 **Deacylation**

564 Purified tRNAs (14  $\mu$ l) supplemented with 6  $\mu$ l of Tris-HCl (pH 8) were deacylated by heating at  
565 40°C for 35 minutes. Reaction was stopped by the addition of 30  $\mu$ l NaAcetate (0.3 M). RNAs  
566 were purified using RNA Clean & Concentrator -5 kit (Zymo) according to manufacturer's  
567 instructions and eluted in 15  $\mu$ l RNase-free  $H_2O$ .

### 568 **3'-tRNAs biotinylation**

569 3'-tRNAs biotinylation was adapted from Pierce RNA 3'-End Biotinylation Kit (Thermo Fisher).  
570 Deacylated tRNAs were denatured in 25% DMSO at 85°C for 5 minutes and directly chilled  
571 on ice. Biotinylation was performed in a 90  $\mu$ l reaction with 6 U of T4 ssRNA Ligase (NEB),  
572 4  $\mu$ l Biotinylated Cytidine (Thermo Fisher, 1mM), 2 U RNase inhibitor, 9  $\mu$ l RNase Buffer  
573 (NEB), 9  $\mu$ l ATP (NEB, 10mM), 40  $\mu$ l PEG 800 (50%), and 20  $\mu$ l denatured RNAs. The  
574 reaction was performed overnight at 16°C. Biotinylated tRNAs were cleaned using RNA Clean  
575 & Concentrator -5 kit (Zymo) according to manufacturer's instructions and eluted in 20  $\mu$ l  $H_2O$ .

### 576 **Probes hybridization**

577 DNA probes were synthesized by *Microsynth AG* and resuspended at a 100  $\mu$ M concentration.  
578 The 606 probes were then mixed at an equimolar ratio (0.15  $\mu$ M each) and aliquoted for further  
579 usage. Hybridization of probes was performed in a 300  $\mu$ l-reaction with 45  $\mu$ l probes mastermix,  
580 30  $\mu$ l hybridization buffer 5x (500 $\mu$ M EGTA, 25mM NaCl, 50mM Tris-HCl), 205  $\mu$ l RNase-free  
581 water and 20  $\mu$ l tRNAs. After a 15 minutes denaturation at 95 °C, the mixture was slowly  
582 cooled down to 55 °C (0.2 °C/second) and incubated for 30 minutes.

### 583 **Beads purification**

584 200  $\mu$ l of Dynabeads MyOne Streptavidin C1 (Thermo Fisher) were washed following manu-  
585 facturer's instructions for RNA usage. 250  $\mu$ l of beads, re-suspended in washing buffer 2x (10  
586 mM Tris-HCl, 1 mM EDTA, 2M NaCl), were incubated with 300 $\mu$ l of the resulting RNA-DNA  
587 hybridization reaction for 40 minutes with gentle rotation. Beads were washed/magnetized three  
588 times with 1ml of washing buffer (1x) and re-suspended in 300  $\mu$ l  $H_2O$ .

### 589 **RNA-DNA hybrid ligation**

590 Bead purified DNA-RNA hybrid on beads were ligated at the anticodon nick by a combination  
591 of SplintR and T4 DNA ligases (NEB) to minimize ligation efficiency bias. 300  $\mu$ l of DNA-RNA  
592 hybrids were splint-ligated with 2.5 U of SplintR DNA ligase and 30 $\mu$ l of SplintR DNA ligase  
593 buffer (10X, NEB) for 1 hours at 25 °C. Then, 10 U of T4 DNA ligase (NEB) and 33 $\mu$ l of T4  
594 DNA ligase buffer (10x, NEB) were added. Ligation was performed overnight at 16 °C.

### 595 **RNA digestion**

596 Beads were magnetized and washed once with washing buffer (1X) to remove any remaining  
597 ligases. Next, beads were re-suspended in 10 $\mu$ l  $H_2O$ . 2 U of RNase A (Thermo Fisher) and 10 U  
598 of RNase H (NEB) with RNase H buffer (10X) (NEB) were added and digestion was performed  
599 for 30 minutes at 37 °C. Elution buffer (5X) was added for a final concentration of 50 mM  
600 tris pH8, 10 mM EDTA, 1% SDS and samples were incubated at 65 °C for 30 minutes with  
601 intermittent shaking to retrieve ligated DNA probes. Beads were magnetized and supernatant  
602 extracted. DNA ligated probes were purified using DNA Clean & Concentrator -5 kit (Zymo)  
603 according to manufacturer's instructions and eluted in 20  $\mu$ l RNase-free  $H_2O$ .

#### 604 **qPCR for quality control and relative concentration estimation**

605 The relative concentration of the resulting DNA ligated-probes was assessed by quantitative  
606 PCR (qPCR) using the LightCycler 480 SYBR Green I Master kit (Roche). 3.5  $\mu$ l of  $\frac{1}{10}$  diluted  
607 samples was used to assemble a 10  $\mu$ l reaction and run on a Light Cycler 480 II (Roche) with  
608 the primers CAGAGTTCTACAGTCCGACGAT and TTGGCACCCGAGAATTCCA (match-  
609 ing each probe's ends) at a final concentration of 0.3  $\mu$ M. Cycling conditions consisted of an  
610 initial denaturation step of 5 min at 95 °C followed by 40 cycles of 30 s at 95 °C and 45 sat 45  
611 °C. The Cp obtained were used to calculate the optimal number of PCR cycles amplification  
612 required for library amplification, as described previously [51]. The number of required cycles  
613 were between 13 and 17 depending on the experiments and samples. The quality of the ligation  
614 was assessed on a Bioanalyzer small RNA chip (Agilent Technologies).

#### 615 **PCR amplification**

616 The PCR was designed following Illumina's recommendation taking advantage of the indexed  
617 oligos from the TruSeq small RNA kit. A 50  $\mu$ l-reaction was assembled with Kapa Polymerase  
618 and 15  $\mu$ l of DNA ligated probes, and run for the optimal number of PCR cycles calculated as  
619 described above.

#### 620 **Library postprocessing**

621 Amplified libraries were purified with 100  $\mu$ l AMPure XP beads (Beckman) and eluted in 20  
622  $\mu$ l resuspension buffer (10 mM Tris, pH8.0). Libraries were quantified with Picogreen (Life  
623 Technology) and usually yield 50-400 ng DNA. The libraries size patterns were checked using a  
624 fragment analyzer (Agilent).

## 625 **Library Sequencing**

626 An equimolar library pool was prepared from the individual libraries based on the concentrations  
627 calculated from Picogreen data. Pools were denatured with NaOH and neutralized with HT1  
628 buffer (Illumina) to reach a final concentration of 20pM. Pools were spiked with 10 % PhiX and  
629 clustered (loading equivalent to 12 samples per lane) onto a rapid single-end flow cell v2 at a  
630 final concentration of 7pM. Sequencing was performed on a HiSeq 2500 (Illumina) in rapid mode  
631 for 130 cycles.

## 632 **Data Analysis**

633 To assess the fidelity of left/right probe ligation and efficiency of hybridization, a fasta file with  
634 all the possible combinations between left and right probes was created. In case two tRNA genes  
635 share the same left/right probes, they were grouped and annotated accordingly. It led us to a  
636 total of 68526 sequences. Genome index was generated with STAR with options  
637 `-runMode genomeGenerate -genomeSAindexNbases 3`. Fastq files were trimmed for adapters.  
638 Sequencing reads were aligned against the index with parameters:

```
639 -outFilterScoreMinOverLread 0 -outFilterMatchNminOverLread 0  
640 -winAnchorMultimapNmax 1000 -outFilterMismatchNmax  
641 -clip3pNbases 6 -clip5pNbases 6  
642 -outFilterMultimapNmax 50 -outSAMattributes NM nM NH NM -alignIntronMax 1  
643 -alignEndsType EndToEnd -seedSearchStartLmax 20 -seedMultimapNmax 100000.
```

644 For each combination, the number of counts were computed and corrected for PCR duplicates  
645 using both unique molecular identifiers sequences. Reads larger than 60 nucleotides with less  
646 than 3 mismatches and less than 5 insertions compared to the reference were retained. Combina-  
647 tions with less than 10 reads were discarded. Reads mapping to combinations of probes coming



648 from different codons were reassigned in function of the newly ligated sequence. Abundances of  
649 tRNA coding for the same codon were summed up and normalized by library size using *edgeR* R  
650 package [90]. Because tRNA moieties (the two halves of the tRNA) have very similar sequences,  
651 and since the specificity of the hybrid DNA-RNA around the anticodon is important for the  
652 ligation, we used the sequence around the anticodon to reassign the ambiguous combinations.

### 653 **Data Availability and specificity**

654 Sequencing data of this study have been submitted to Gene Expression Omnibus (GEO) under  
655 accession number GSE126384: <https://www.ncbi.nlm.nih.gov/geo/query/acc.cgi?acc=GSE126384>).  
656 Datasets and GEO references: Atger Liver (GSE73553, n=84), Howard Liver (SRR826795,  
657 SRR826796, SRR826797, n=3), Huh Linter (SRR5227294, SRR5227295, SRR5227296, SRR5227303,  
658 SRR5227304, SRR5227305, n=6), Jan Yeast (SRR1562907, SRR1562909, SRR1562911, SRR1562913,  
659 n = 4), Kidney Castelo (GSE81283, n=24), Guydosh Yeast (SRR1042865, SRR1042866, SRR1042867,  
660 n= 1).

## 661 **Acknowledgments**

662 We thank Nicolas Bonhoure and Stefan Morgenthaler for useful discussions. Research in the  
663 Naef laboratory was supported by the EPFL. Some computations were performed on the Vital-It  
664 computing platform.

## 665 **Conflict of interest statement**

666 CG, BW, EM, and FG were employees of Nestle Institute of Health Sciences SA, CH-1015 Lau-  
667 sanne, Switzerland.

## 668 **Supplementary material**

669 Table 1. Inferred single-codon DTs  
670 Table 2. Inferred codon-pair DTs  
671 Table 3. Ribosome profiling in AL and FA mice w/o CHX  
672 Table 4. (aminoacyl-) tRNA profiling in AL and FA mice

## 673 **Code availability**

674 Snakefile to model DTs and flux from ribosome profiling data will be made publicly available on  
675 github upon publication.

## 676 **References**

677 1. Gobet, C. & Naef, F. Ribosome profiling and dynamic regulation of translation in mammals.  
678 *Current Opinion in Genetics and Development* **43**. ISSN: 18790380. doi:10.1016/j.gde.  
679 2017.03.005 (2017).

- 680 2. Hinnebusch, A. G. & Lorsch, J. R. The mechanism of eukaryotic translation initiation:  
681 new insights and challenges. *Cold Spring Harbor perspectives in biology* **4**, a011544. ISSN:  
682 1943-0264 (Oct. 2012).
- 683 3. Brule, C. E. & Grayhack, E. J. Synonymous Codons: Choose Wisely for Expression. *Trends*  
684 *in Genetics* **33**, 283–297. ISSN: 01689525 (Apr. 2017).
- 685 4. Presnyak, V. *et al.* Codon Optimality Is a Major Determinant of mRNA Stability. *Cell*  
686 **160**, 1111–1124. ISSN: 00928674 (Mar. 2015).
- 687 5. Radhakrishnan, A. *et al.* The DEAD-Box Protein Dhh1p Couples mRNA Decay and Trans-  
688 lation by Monitoring Codon Optimality. *Cell* **0**, 1497–1506. ISSN: 00928674 (2016).
- 689 6. Pelechano, V., Wei, W. & Steinmetz, L. M. Widespread Co-translational RNA Decay Re-  
690 veals Ribosome Dynamics. *Cell* **161**, 1400–1412. ISSN: 00928674 (June 2015).
- 691 7. Yu, C.-H. *et al.* Codon Usage Influences the Local Rate of Translation Elongation to Reg-  
692 ulate Co-translational Protein Folding. *Molecular Cell* **59**, 744–754. ISSN: 10972765 (Sept.  
693 2015).
- 694 8. Chu, D., Kazana, E., Bellanger, N., Singh, T., Tuite, M. F. & von der Haar, T. Translation  
695 elongation can control translation initiation on eukaryotic mRNAs. *The EMBO Journal*  
696 **33**, 21–34. ISSN: 02614189 (Jan. 2014).
- 697 9. Goodarzi, H., Nguyen, H. C., Zhang, S., Dill, B. D., Molina, H. & Tavazoie, S. F. Modulated  
698 Expression of Specific tRNAs Drives Gene Expression and Cancer Progression. *Cell* **165**,  
699 1416–1427. ISSN: 00928674 (June 2016).
- 700 10. Loayza-Puch, F. *et al.* Tumour-specific proline vulnerability uncovered by differential ribo-  
701 some codon reading. *Nature* **530**, 490–494. ISSN: 0028-0836 (Feb. 2016).
- 702 11. Rapino, F. *et al.* Codon-specific translation reprogramming promotes resistance to targeted  
703 therapy. *Nature* **558**, 605–609. ISSN: 14764687 (2018).

- 704 12. Varenne, S., Buc, J., Lloubes, R. & Lazdunski, C. Translation is a non-uniform process.  
705 *Journal of Molecular Biology* **180**, 549–576. ISSN: 00222836 (Dec. 1984).
- 706 13. Quax, T. E., Claassens, N. J., Söll, D. & van der Oost, J. Codon Bias as a Means to  
707 Fine-Tune Gene Expression. *Molecular Cell* **59**, 149–161. ISSN: 10972765 (July 2015).
- 708 14. Sørensen, M. A. & Pedersen, S. Absolute in vivo translation rates of individual codons  
709 in *Escherichia coli*. The two glutamic acid codons GAA and GAG are translated with a  
710 threefold difference in rate. *Journal of Molecular Biology* **222**, 265–280. ISSN: 00222836  
711 (1991).
- 712 15. Ingolia, N. T., Lareau, L. F. & Weissman, J. S. Ribosome Profiling of Mouse Embryonic  
713 Stem Cells Reveals the Complexity and Dynamics of Mammalian Proteomes. *Cell* **147**,  
714 789–802. ISSN: 00928674 (Nov. 2011).
- 715 16. Heesch, S. V. *et al.* The Translational Landscape of the Human Heart Resource The Trans-  
716 lational Landscape of the Human Heart, 1–19 (2019).
- 717 17. Ingolia, N. T. Ribosome Footprint Profiling of Translation throughout the Genome. *Cell*  
718 **165**, 22–33. ISSN: 00928674 (Mar. 2016).
- 719 18. Pop, C. *et al.* Causal signals between codon bias, mRNA structure, and the efficiency of  
720 translation and elongation. *Mol Syst Biol* **10**. doi:10.15252/msb (2014).
- 721 19. O’Connor, P. B. F., Andreev, D. E. & Baranov, P. V. Comparative survey of the relative  
722 impact of mRNA features on local ribosome profiling read density. *Nature Communications*  
723 **7**, 12915. ISSN: 2041-1723 (Oct. 2016).
- 724 20. Fang, H., Huang, Y. F., Radhakrishnan, A., Siepel, A., Lyon, G. J. & Schatz, M. C. Scikit-  
725 ribo Enables Accurate Estimation and Robust Modeling of Translation Dynamics at Codon  
726 Resolution. *Cell Systems*. ISSN: 24054720. doi:10.1016/j.cels.2017.12.007 (2018).

- 727 21. Tunney, R., McGlincy, N. J., Graham, M. E., Naddaf, N., Pachter, L. & Lareau, L. F.  
728 Accurate design of translational output by a neural network model of ribosome distribution.  
729 *Nature Structural and Molecular Biology* **25**, 577–582. ISSN: 15459985 (2018).
- 730 22. Charneski, C. A. & Hurst, L. D. Positively charged residues are the major determinants of  
731 ribosomal velocity. *PLoS biology* **11**, e1001508. ISSN: 1545-7885 (2013).
- 732 23. Darnell, A. M., Subramaniam, A. R. & O’Shea, E. K. Translational Control through Dif-  
733 ferential Ribosome Pausing during Amino Acid Limitation in Mammalian Cells. *Molecular*  
734 *Cell* **71**, 229–243. ISSN: 10974164 (2018).
- 735 24. Saikia, M., Wang, X., Mao, Y., Wan, J., Pan, T. & Qian, S.-B. Codon optimality controls  
736 differential mRNA translation during amino acid starvation. doi:10.1261/rna.058180.  
737 116.
- 738 25. Guydosh, N. R. & Green, R. Dom34 Rescues Ribosomes in 3 Untranslated Regions. *Cell*  
739 **156**, 950–962 (2014).
- 740 26. Nedialkova, D. D. & Leidel, S. A. Optimization of Codon Translation Rates via tRNA  
741 Modifications Maintains Proteome Integrity. *Cell* **161**, 1606–1618. ISSN: 00928674 (June  
742 2015).
- 743 27. Tuorto, F. *et al.* The tRNA methyltransferase Dnmt2 is required for accurate polypeptide  
744 synthesis during haematopoiesis. *The EMBO Journal* **34**, 2350–2362 (2015).
- 745 28. Chou, H.-J., Donnard, E., Gustafsson, H. T., Garber, M. & Rando, O. J. Transcriptome-  
746 wide Analysis of Roles for tRNA Modifications in Translational Regulation. *Molecular Cell*  
747 **68**, 978–992. ISSN: 10972765 (Dec. 2017).
- 748 29. Pop, C. *et al.* Causal signals between codon bias , mRNA structure , and the efficiency of  
749 translation and elongation. *Molecular systems biology*, 1–16 (2014).

- 750 30. Zhang, S., Hu, H., Zhou, J., He, X., Jiang, T. & Zeng, J. Analysis of Ribosome Stalling  
751 and Translation Elongation Dynamics by Deep Learning. *Cell Systems* **5**, 212–220. ISSN:  
752 24054720 (Sept. 2017).
- 753 31. Gorochoowski, T. E., Ignatova, Z., Bovenberg, R. a. L. & Roubos, J. A. Trade-offs be-  
754 tween tRNA abundance and mRNA secondary structure support smoothing of translation  
755 elongation rate. *Nucleic Acids Research* **43**, 3022–3032. ISSN: 0305-1048 (Mar. 2015).
- 756 32. Döring, K. *et al.* Profiling Ssb-Nascent Chain Interactions Reveals Principles of Hsp70-  
757 Assisted Folding. *Cell* **170**, 298–311. ISSN: 10974172 (2017).
- 758 33. Harigaya, Y. & Parker, R. The link between adjacent codon pairs and mRNA stability.  
759 *BMC Genomics* **18**, 364. ISSN: 1471-2164 (Dec. 2017).
- 760 34. Gamble, C. E., Brule, C. E., Dean, K. M., Fields, S. & Grayhack, E. J. Adjacent Codons Act  
761 in Concert to Modulate Translation Efficiency in Yeast. *Cell* **166**, 679–690. ISSN: 00928674  
762 (July 2016).
- 763 35. Dao Duc, K. & Song, Y. S. The impact of ribosomal interference, codon usage, and exit  
764 tunnel interactions on translation elongation rate variation. *PLOS Genetics* **14** (ed Tuller,  
765 T.) e1007166. ISSN: 1553-7404 (Jan. 2018).
- 766 36. Gardin, J., Yeasmin, R., Yurovsky, A., Cai, Y., Skiena, S. & Futcher, B. Measurement of  
767 average decoding rates of the 61 sense codons in vivo. *eLife* **3**. ISSN: 2050-084X. doi:10.  
768 7554/eLife.03735. <https://elifesciences.org/articles/03735> (Oct. 2014).
- 769 37. Aeschimann, F., Xiong, J., Arnold, A., Dieterich, C. & Großhans, H. Transcriptome-wide  
770 measurement of ribosomal occupancy by ribosome profiling. *Methods* **85**, 75–89. ISSN:  
771 10462023 (Sept. 2015).
- 772 38. Lareau, L. F., Hite, D. H., Hogan, G. J. & Brown, P. O. Distinct stages of the translation  
773 elongation cycle revealed by sequencing ribosome-protected mRNA fragments. *eLife* **3**,  
774 e01257. ISSN: 2050-084X (May 2014).

- 775 39. Duncan, C. D. S. & Mata, J. Effects of cycloheximide on the interpretation of ribosome  
776 profiling experiments in *Schizosaccharomyces pombe*. *Scientific Reports*. ISSN: 2045-2322.  
777 doi:10.1038/s41598-017-10650-1 (2017).
- 778 40. Gerashchenko, M. V., Lobanov, A. V. & Gladyshev, V. N. Genome-wide ribosome profiling  
779 reveals complex translational regulation in response to oxidative stress. *Proceedings of the*  
780 *National Academy of Sciences* **109**, 17394–17399. ISSN: 0027-8424 (Oct. 2012).
- 781 41. Hussmann, J. a., Patchett, S., Johnson, A., Sawyer, S. & Press, W. H. Understanding  
782 Biases in Ribosome Profiling Experiments Reveals Signatures of Translation Dynamics in  
783 Yeast. *PLOS Genetics* **11** (ed Snyder, M.) e1005732. ISSN: 1553-7404 (Dec. 2015).
- 784 42. Bartholomäus, A., Del Campo, C. & Ignatova, Z. Mapping the non-standardized biases of  
785 ribosome profiling. *Biological Chemistry* **397**. ISSN: 1437-4315. doi:10.1515/hsz-2015-  
786 0197. [https://www.degruyter.com/view/j/bchm.2016.397.issue-1/hsz-2015-  
787 0197/hsz-2015-0197.xml](https://www.degruyter.com/view/j/bchm.2016.397.issue-1/hsz-2015-0197/hsz-2015-0197.xml) (Jan. 2016).
- 788 43. Quax, T. E., Claassens, N. J., Söll, D. & van der Oost, J. Codon Bias as a Means to  
789 Fine-Tune Gene Expression. *Molecular Cell* **59**, 149–161. ISSN: 10972765 (July 2015).
- 790 44. Orioli, A. tRNA biology in the omics era: Stress signalling dynamics and cancer progression.  
791 *BioEssays* **39**, 1600158. ISSN: 02659247 (Mar. 2017).
- 792 45. Zheng, G. *et al.* Efficient and quantitative high-throughput tRNA sequencing. *Nature Meth-*  
793 *ods* **12**, 835–837. ISSN: 1548-7091 (Sept. 2015).
- 794 46. Gogakos, T., Brown, M., Garzia, A., Meyer, C., Hafner, M. & Tuschl, T. Characterizing  
795 Expression and Processing of Precursor and Mature Human tRNAs by Hydro-tRNAseq  
796 and PAR-CLIP. *Cell Reports* **20**, 1463–1475. ISSN: 22111247 (Aug. 2017).
- 797 47. Cozen, A. E., Quartley, E., Holmes, A. D., Hrabeta-Robinson, E., Phizicky, E. M. & Lowe,  
798 T. M. ARM-seq: AlkB-facilitated RNA methylation sequencing reveals a complex landscape  
799 of modified tRNA fragments. *Nature Methods* **12**, 879–884. ISSN: 1548-7091 (Sept. 2015).

- 800 48. Evans, M. E., Clark, W. C., Zheng, G. & Pan, T. Determination of tRNA aminoacylation  
801 levels by high-throughput sequencing. *Nucleic Acids Research* **45**, e133–e133. ISSN: 0305-  
802 1048 (Aug. 2017).
- 803 49. Jan, C. H., Williams, C. C. & Weissman, J. S. Principles of ER cotranslational translocation  
804 revealed by proximity-specific ribosome profiling. *Science* **346**, 1257521–1257521. ISSN:  
805 0036-8075 (Nov. 2014).
- 806 50. Ingolia, N. T., Hussmann, J. A. & Weissman, J. S. Ribosome Profiling: Global Views of  
807 Translation. *Cold Spring Harbor Perspectives in Biology*, a032698. ISSN: 1943-0264 (July  
808 2018).
- 809 51. Atger, F. *et al.* Circadian and feeding rhythms differentially affect rhythmic mRNA tran-  
810 scription and translation in mouse liver. *Proceedings of the National Academy of Sciences*  
811 **112**, E6579–E6588. ISSN: 0027-8424 (Nov. 2015).
- 812 52. González, A. & Hall, M. N. Nutrient sensing and TOR signaling in yeast and mammals.  
813 *The EMBO Journal* **36**, 397–408. ISSN: 0261-4189 (Feb. 2017).
- 814 53. Gutierrez, E. *et al.* eIF5A Promotes Translation of Polyproline Motifs. *Molecular Cell* **51**,  
815 35–45. ISSN: 10972765 (July 2013).
- 816 54. Lecanda, A. *et al.* Dual randomization of oligonucleotides to reduce the bias in ribosome-  
817 profiling libraries. *Methods* **107**, 89–97. ISSN: 10959130 (2016).
- 818 55. Gerashchenko, M. V. & Gladyshev, V. N. Translation inhibitors cause abnormalities in  
819 ribosome profiling experiments. *Nucleic Acids Research*. ISSN: 13624962. doi:10.1093/  
820 nar/gku671 (2014).
- 821 56. Zhang, F., Xu, X., Zhou, B., He, Z. & Zhai, Q. Gene Expression Profile Change and  
822 Associated Physiological and Pathological Effects in Mouse Liver Induced by Fasting and  
823 Refeeding. *PLoS ONE* **6** (ed Androulakis, I. P.) e27553. ISSN: 1932-6203 (Nov. 2011).



- 824 57. Howard, M. T., Carlson, B. a., Anderson, C. B. & Hatfield, D. L. Translational redefinition  
825 of UGA codons is regulated by selenium availability. *Journal of Biological Chemistry* **288**,  
826 19401–19413. ISSN: 00219258 (2013).
- 827 58. Castelo-Szekely, V., Arpat, A. B., Janich, P. & Gatfield, D. Translational contributions to  
828 tissue specificity in rhythmic and constitutive gene expression. *Genome Biology* **18**. ISSN:  
829 1474760X. doi:10.1186/s13059-017-1222-2 (2017).
- 830 59. Lintner, N. G. *et al.* Selective stalling of human translation through small-molecule en-  
831 gagement of the ribosome nascent chain. *PLOS Biology* **15** (ed Khosla, C.) e2001882. ISSN:  
832 1545-7885 (Mar. 2017).
- 833 60. Dittmar, K. A., Sørensen, M. A., Elf, J., Ehrenberg, M. & Pan, T. Selective charging of  
834 tRNA isoacceptors induced by amino-acid starvation. *EMBO reports* **6**, 151–157. ISSN:  
835 1469-221X (Feb. 2005).
- 836 61. Lowe, T. M. & Chan, P. P. tRNAscan-SE On-line: integrating search and context for  
837 analysis of transfer RNA genes. *Nucleic acids research*. ISSN: 13624962. doi:10.1093/nar/  
838 gkw413 (2016).
- 839 62. Canella, D. *et al.* A multiplicity of factors contributes to selective RNA polymerase III  
840 occupancy of a subset of RNA polymerase III genes in mouse liver. *Genome Research*.  
841 ISSN: 10889051. doi:10.1101/gr.130286.111 (2012).
- 842 63. Rudolph, K. L. M. *et al.* Codon-Driven Translational Efficiency Is Stable across Diverse  
843 Mammalian Cell States. *PLoS Genetics* **12**, 1–23. ISSN: 15537404 (2016).
- 844 64. Pechmann, S. & Frydman, J. Evolutionary conservation of codon optimality reveals hidden  
845 signatures of cotranslational folding. *Nature Structural & Molecular Biology* **20**, 237–243.  
846 ISSN: 1545-9993 (Feb. 2013).

- 847 65. Woolstenhulme, C. J., Guydosh, N. R., Green, R. & Buskirk, A. R. High-Precision Analysis  
848 of Translational Pausing by Ribosome Profiling in Bacteria Lacking EFP. *Cell Reports* **11**,  
849 13–21. ISSN: 22111247 (Apr. 2015).
- 850 66. Chevance, F. F. V. & Hughes, K. T. Case for the genetic code as a triplet of triplets.  
851 *Proceedings of the National Academy of Sciences* **114**, 4745–4750. ISSN: 0027-8424 (May  
852 2017).
- 853 67. Kanaya, S., Yamada, Y., Kudo, Y. & Ikemura, T. Studies of codon usage and tRNA genes  
854 of 18 unicellular organisms and quantification of *Bacillus subtilis* tRNAs: Gene expression  
855 level and species-specific diversity of codon usage based on multivariate analysis. *Gene*.  
856 ISSN: 03781119. doi:10.1016/S0378-1119(99)00225-5 (1999).
- 857 68. Ingolia, N. T. Ribosome profiling: new views of translation, from single codons to genome  
858 scale. *Nature Reviews Genetics* **15**, 205–213. ISSN: 1471-0056 (Mar. 2014).
- 859 69. Mohammad, F., Woolstenhulme, C. J., Green, R. & Buskirk, A. R. Clarifying the Trans-  
860 lational Pausing Landscape in Bacteria by Ribosome Profiling. *Cell Reports* **14**, 686–694.  
861 ISSN: 22111247 (Feb. 2016).
- 862 70. Wu, C. C.-C., Zinshteyn, B., Wehner, K. A. & Green, R. High-Resolution Ribosome Pro-  
863 filing Defines Discrete Ribosome Elongation States and Translational Regulation during  
864 Cellular Stress. *Molecular Cell* **0**, 1–12. ISSN: 10972765 (Jan. 2019).
- 865 71. Rodnina, M. V. The ribosome in action: Tuning of translational efficiency and protein  
866 folding. *Protein Science* **25**, 1390–1406. ISSN: 09618368 (Aug. 2016).
- 867 72. Agris, P. F., Eruysal, E. R., Narendran, A., Väre, V. Y. P., Vangaveti, S. & Ranganathan,  
868 S. V. Celebrating wobble decoding: Half a century and still much is new. *RNA Biology* **15**,  
869 537–553. ISSN: 1547-6286 (May 2018).
- 870 73. Alkatib, S. *et al.* The Contributions of Wobbling and Superwobbling to the Reading of the  
871 Genetic Code. *PLoS Genetics* **8** (ed Maraia, R. J.) e1003076. ISSN: 1553-7404 (Nov. 2012).

- 872 74. Yang, J. R., Chen, X. & Zhang, J. Codon-by-Codon Modulation of Translational Speed  
873 and Accuracy Via mRNA Folding. *PLoS Biology*. ISSN: 15457885. doi:10.1371/journal.  
874 pbio.1001910 (2014).
- 875 75. Stadler, M. & Fire, A. Wobble base-pairing slows in vivo translation elongation in meta-  
876 zoans. *RNA* **17**, 2063–2073. ISSN: 1355-8382 (Dec. 2011).
- 877 76. Pavlov, M. Y., Watts, R. E., Tan, Z., Cornish, V. W., Ehrenberg, M. & Forster, A. C. Slow  
878 peptide bond formation by proline and other N-alkylamino acids in translation. *Proceedings*  
879 *of the National Academy of Sciences* **106**, 50–54. ISSN: 0027-8424 (2009).
- 880 77. Lubas, M. *et al.* eIF5A is required for autophagy by mediating ATG3 translation. doi:10.  
881 15252/embr.201846072.
- 882 78. Pelechano, V. & Alepuz, P. eIF5A facilitates translation termination globally and pro-  
883 motes the elongation of many non polyproline-specific tripeptide sequences. *Nucleic Acids*  
884 *Research* **45**, 7326–7338. ISSN: 0305-1048 (July 2017).
- 885 79. Shalgi, R., Hurt, J. A., Krykbaeva, I., Taipale, M., Lindquist, S. & Burge, C. B. Widespread  
886 Regulation of Translation by Elongation Pausing in Heat Shock. *Molecular Cell* **49**, 439–  
887 452. ISSN: 10972765 (Feb. 2013).
- 888 80. Somogyi, P., Jenner, A. J., Brierley, I. & Inglis, S. C. Ribosomal pausing during translation  
889 of an RNA pseudoknot. *Molecular and cellular biology* **13**, 6931–40. ISSN: 0270-7306 (1993).
- 890 81. Tholstrup, J., Oddershede, L. B. & Sørensen, M. A. MRNA pseudoknot structures can act  
891 as ribosomal roadblocks. *Nucleic Acids Research*. ISSN: 03051048. doi:10.1093/nar/gkr686  
892 (2012).
- 893 82. Juskiewicz, S., Chandrasekaran, V., Lin, Z., Kraatz, S., Ramakrishnan, V. & Hegde, R. S.  
894 ZNF598 Is a Quality Control Sensor of Collided Ribosomes. *Molecular Cell* **72**, 469–481.  
895 ISSN: 10972765 (Nov. 2018).

- 896 83. Simms, C. L., Yan, L. L. & Zaher, H. S. Ribosome Collision Is Critical for Quality Control  
897 during No-Go Decay. *Molecular Cell* **68**, 361–373. ISSN: 10972765 (Oct. 2017).
- 898 84. Arpat, A. B., Liechti, A., De Matos, M., Dreos, R., Janich, P. & Gatfield, D. Transcriptome-  
899 wide sites of collided ribosomes reveal principles of translational pausing. *bioRxiv*. doi:10.  
900 1101/710061 (0).
- 901 85. Dittmar, K. A., Goodenbour, J. M. & Pan, T. Tissue-Specific Differences in Human Trans-  
902 fer RNA Expression. *PLoS Genetics* **2**, e221. ISSN: 1553-7390 (Dec. 2006).
- 903 86. Tatarinova, T. V., Alexandrov, N. N., Bouck, J. B. & Feldmann, K. A. GC3biology in corn,  
904 rice, sorghum and other grasses. *BMC Genomics* **11**. ISSN: 14712164. doi:10.1186/1471-  
905 2164-11-308 (2010).
- 906 87. Wolfson, R. L. & Sabatini, D. M. The Dawn of the Age of Amino Acid Sensors for the  
907 mTORC1 Pathway. *Cell Metabolism* **26**, 301–309. ISSN: 19327420 (Aug. 2017).
- 908 88. Dobin, A. *et al.* STAR: Ultrafast universal RNA-seq aligner. *Bioinformatics* **29**, 15–21.  
909 ISSN: 13674803 (2013).
- 910 89. Love, M. I., Huber, W. & Anders, S. Moderated estimation of fold change and dispersion  
911 for RNA-seq data with DESeq2. *Genome Biology* **15**, 1–21. ISSN: 1474760X (2014).
- 912 90. Robinson, M. D., Mccarthy, D. J. & Smyth, G. K. edgeR: a Bioconductor package for  
913 differential expression analysis of digital gene expression data. *BIOINFORMATICS AP-  
914 PPLICATIONS NOTE* **26**, 139–140 (2010).

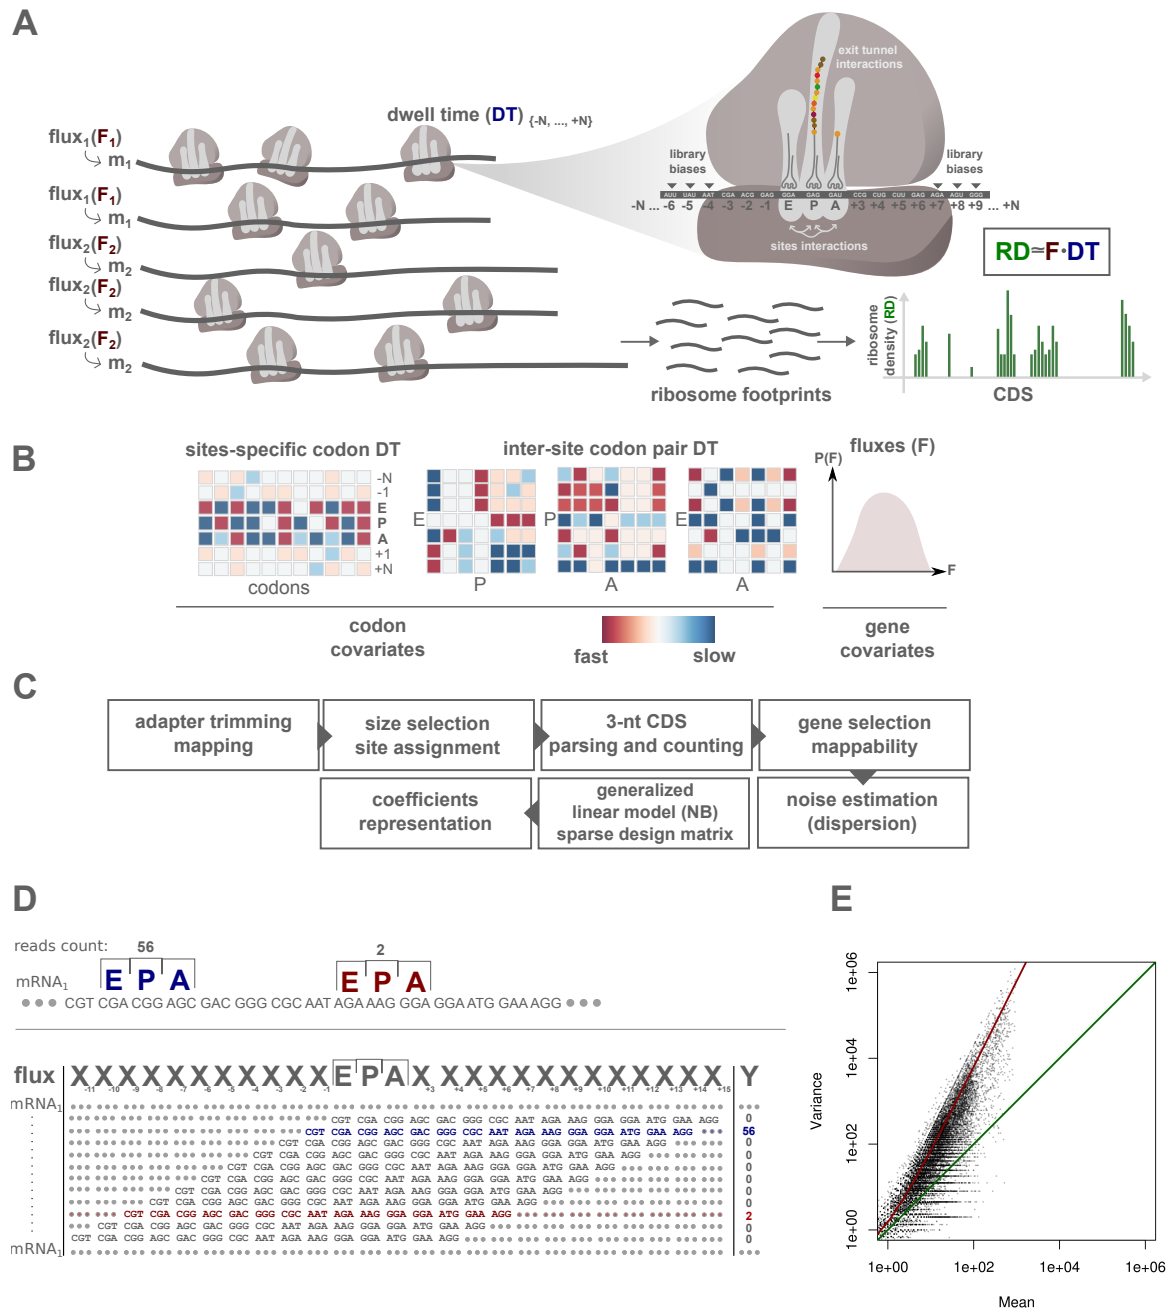

Figure S1: **Modeling ribosome fluxes and codon-specific DT including codon-pair contributions**

A. Ribosome elongation: Snapshot of two different mRNA species ( $m_1, m_2$ ) translated with two different fluxes ( $F_1, F_2$ ). Zoomed ribosome shows that numerous factors regulate ribosome DTs: 40 codons (+20,-20) around the E site are taken into account in the model to alleviate possible library biases, exit tunnel interactions, and influence of upstream/downstream sequences. Codon-pair interactions between the three sites (E, P, A) are also modeled. The ribosome densities on the mRNAs are estimated by ribosome profiling, and modeled as genes fluxes multiplied by DTs. B. Single-codon and codon-pair DTs are visualized in a heatmap, relative to the position mean. The matrix of codon-pair interactions (E:P, P:A, and E:A) shows all possible combinations of codon pairs. All regression coefficients (gene fluxes and DTs) are inferred genome-wide. C. Bioinformatics pipeline: Sequencing reads are trimmed and mapped to the genome. Reads are first selected based on their size and E sites are assigned for each read. All annotated CDSs are parsed with a step of 3 nucleotides and number of reads are reported at each position. Genes with insufficient total read counts and read densities are removed, as well as regions with non-unique mappability. Dispersion parameters for negative binomial distributions are estimated for each sample and the GLM is fitted with a sparse design matrix and negative binomial (NB) noise model. DTs are centered (in log<sub>2</sub> scale) and represented as shown in Fig. S1B. D. Construction of the data matrix for the GLM. Example of a gene CDS with two different positions (dark blue and dark red) covered by 56 and 2 reads, respectively. The assigned E, P, and A sites are shown. The CDS is parsed 3-by-3 and a matrix is designed with the corresponding position-dependent codons. E. Mean and variance of measured counts for pairs of codons occurring multiple times on a gene. The green line shows a *Poisson* regime with the variance equal to the mean. The red line represents the estimated fit for a negative binomial distribution (Methods). The dispersion parameter is estimated from these fits and used to parameterize the NB used in the GLM, independently for each sample.

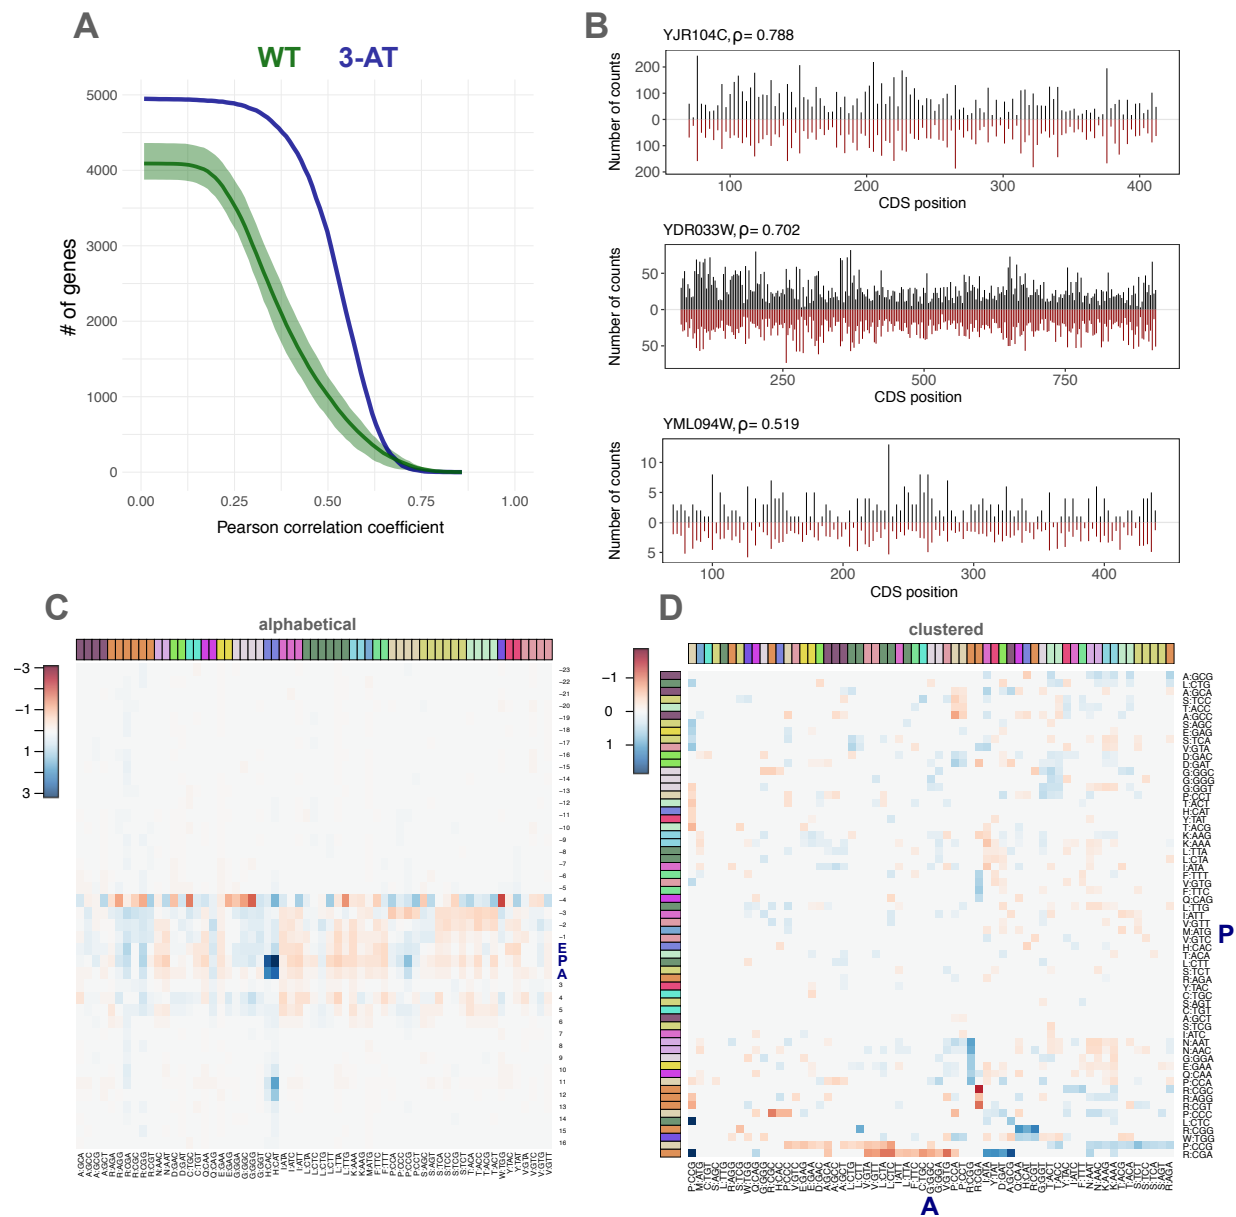

**Figure S2: In yeast ribosome DT anticorrelate with codon usage and exhibit codon-pair interactions**  
Panels for the single-codon DTs are retrieved from the fit with the P:A interaction. **A**. Gene-specific Pearson correlation coefficient ( $\rho$ ) between measured and fitted read counts. Number of genes with  $\rho$  larger than x-axis values are depicted. WT (green) and 3-AT (blue). **B**. Measured (black) and fitted (red) read counts for three representative genes. **C**. Heatmap representation of the DTs ( $\log_2$ , mean centered per site) in a window of 40 codons around the E site. Codons are ordered by amino acid and colored accordingly at the top of the heatmap. DTs with  $p \geq 0.05$  are not shown (set to zero). **D**. Interaction matrix for the pairs P:A ( $\log_2$ ). Codons are colored according to amino acid. Codons in both sites are hierarchically clustered based on the euclidean distance matrix and a complete linkage algorithm. Fast and slow interactions are shown respectively in dark red and dark blue (colorbar). DTs with  $p$ -value  $\geq 0.05$  are set to zero.

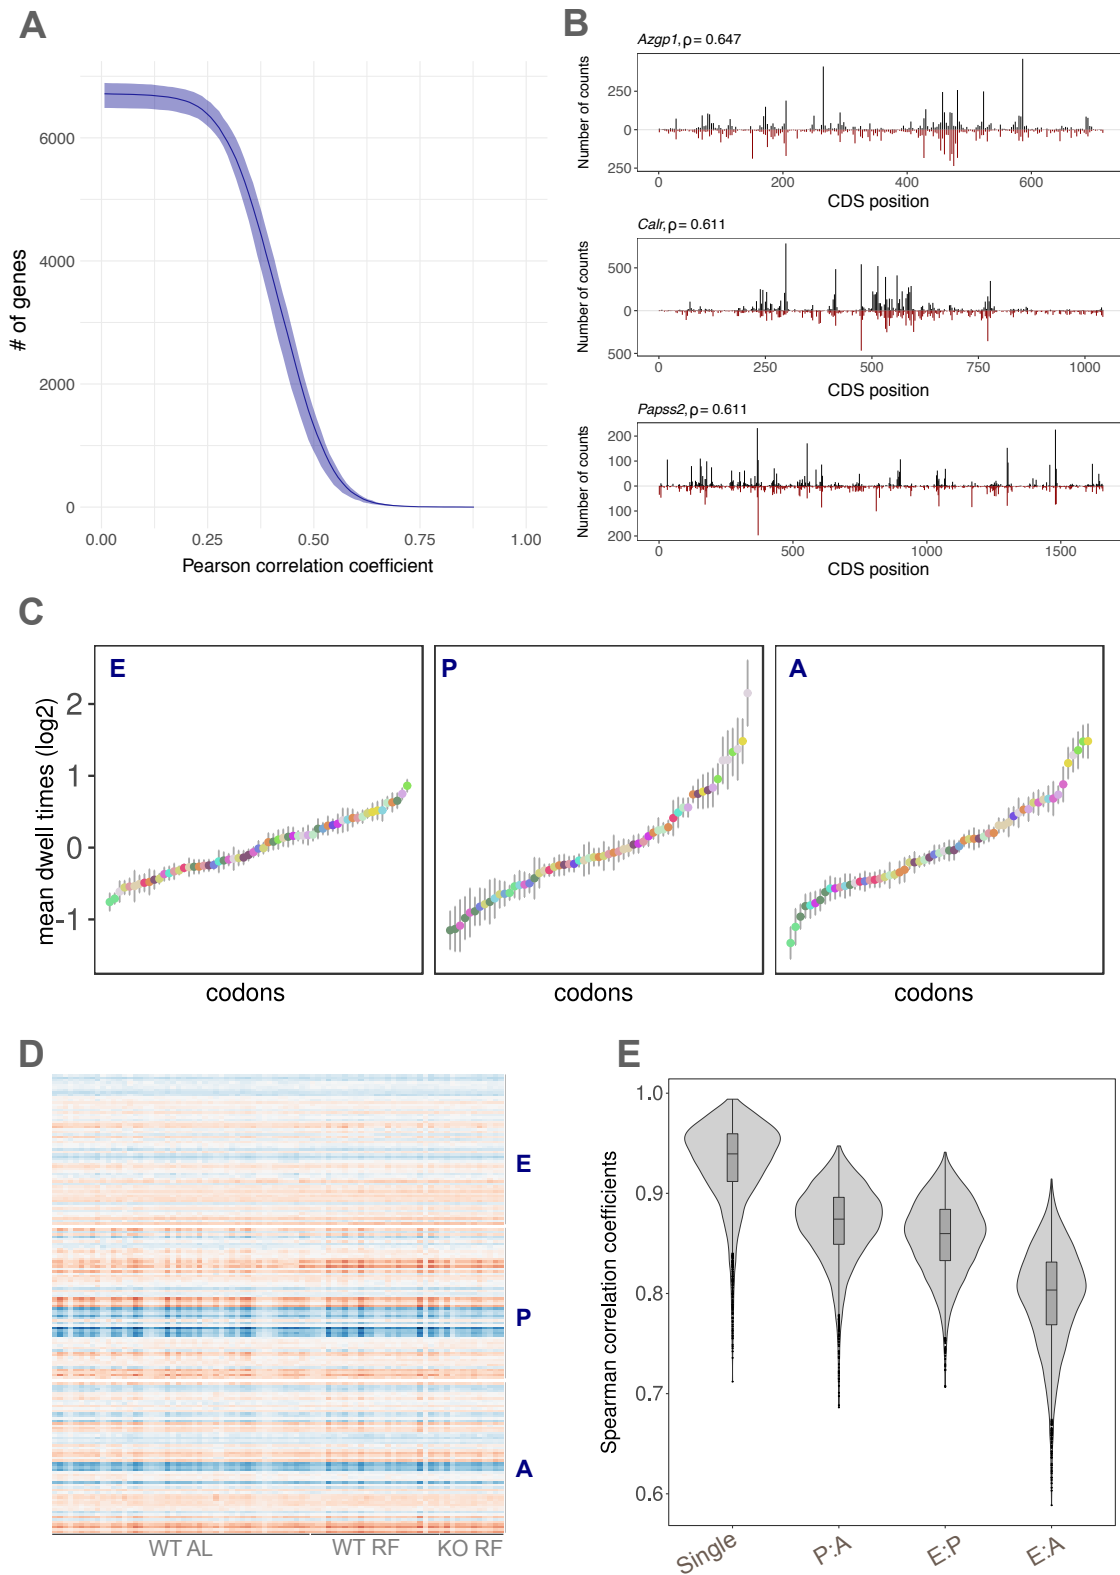

Figure S3: **Sample specific DTs and correlations**

A. Gene-specific Pearson correlation coefficient ( $\rho$ ) between measured and fitted read counts for four AL samples [51]. Number of genes with  $\rho$  larger than x-axis values are depicted. B. Measured (black) and fitted (red) read counts for three representative genes in one AL sample. C. Mean DTs and standard deviation over the 84 samples for the E, P, and A sites. D. DTs (log<sub>2</sub>, mean centered per site) at the E, P, and A sites for the 84 samples in the three conditions WT AL (WT ad libitum), WT RF (WT night-restricted feeding), and KO RF (*Bmal1* KO night-restricted feeding). E. Inter-sample Spearman correlation coefficients for site-specific DTs (single) and codon-pair DTs for the interactions P:A, E:P, and E:A.

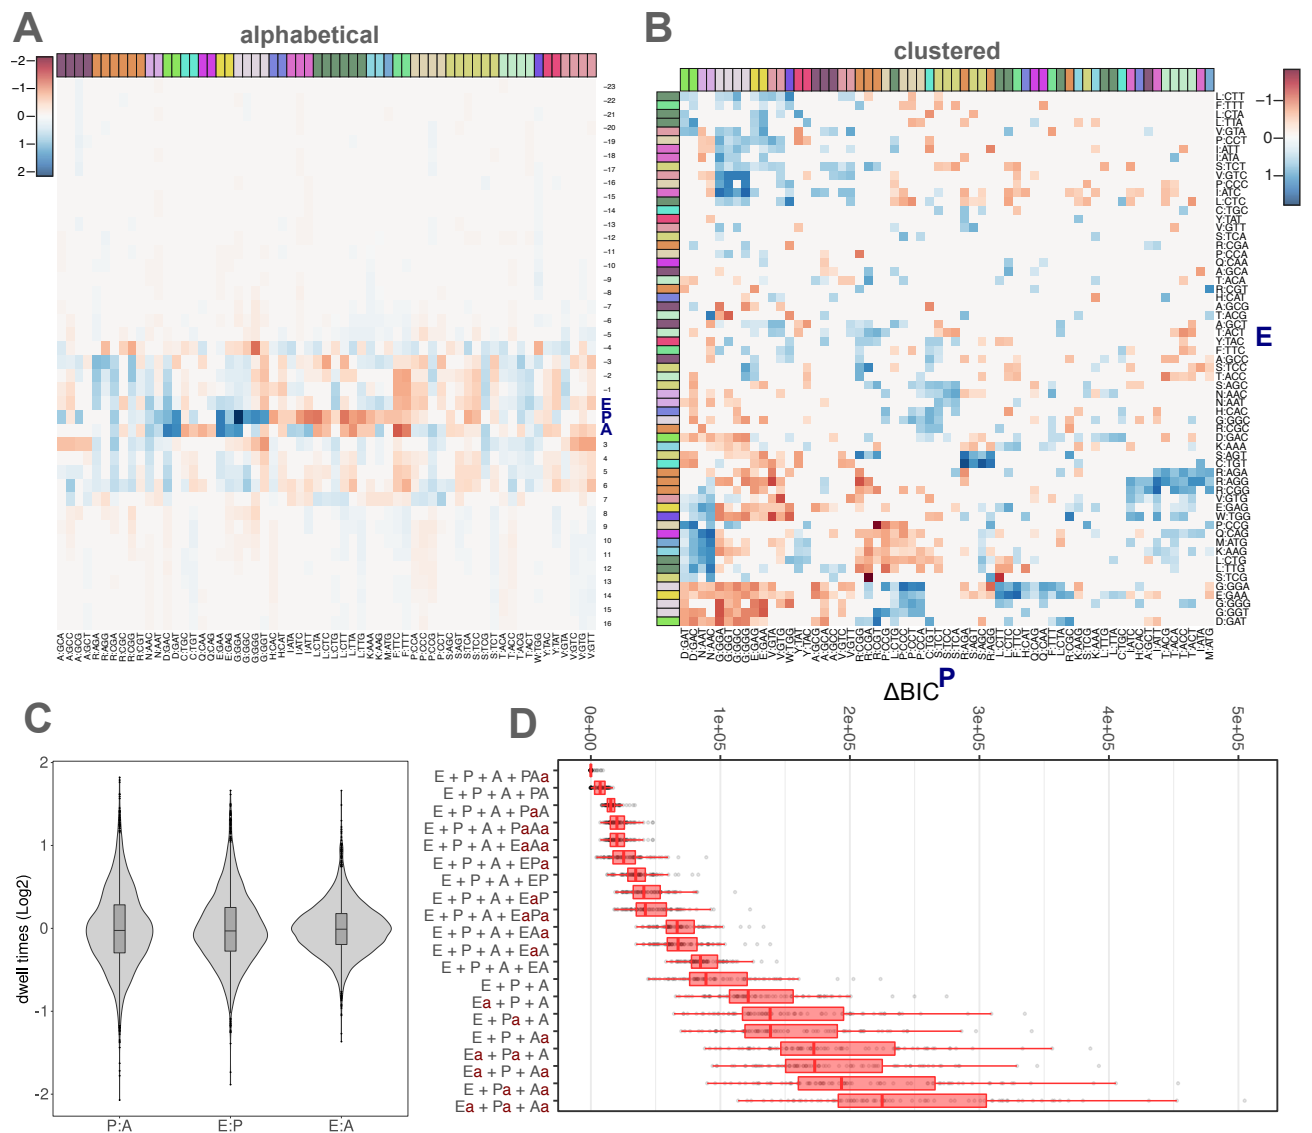

Figure S4: **Extended analysis of the translation elongation landscape in mouse liver**

Single-codon DTs are retrieved from the fit with the P:A interaction. A. Heatmap representation of the DTs ( $\log_2$ , mean centered per site) in a window of 40 codons around the E site. Codons are ordered by amino acid and colored accordingly. DTs with  $p \geq 0.05$  are not shown (set to zero). B. Interaction matrix for E:P interactions ( $\log_2$ ). Codons are colored according to amino acid. Codons in both sites are hierarchically clustered based on the euclidean distance matrix and a complete linkage algorithm. Relatively fast and slow interactions are shown respectively in dark red and dark blue. DTs with p-value  $\geq 0.05$  are not shown (set to zero). C. DT ( $\log_2$ ) distributions and boxplots for the three interaction terms P:A, E:P and E:A of the 84 samples in mouse liver. D. Differences of Bayesian Information Criterion ( $\Delta BIC^P$ ) between the model shown and the best model. ( $\Delta BIC$ ) is computed for each sample and proposed model, in which the alphabet for the DT covariates was taken as either the 20 natural amino acids or the 61 sense codons. A lowercase 'a' on the right of an uppercase letter indicates that the amino acid alphabet was used for this position.



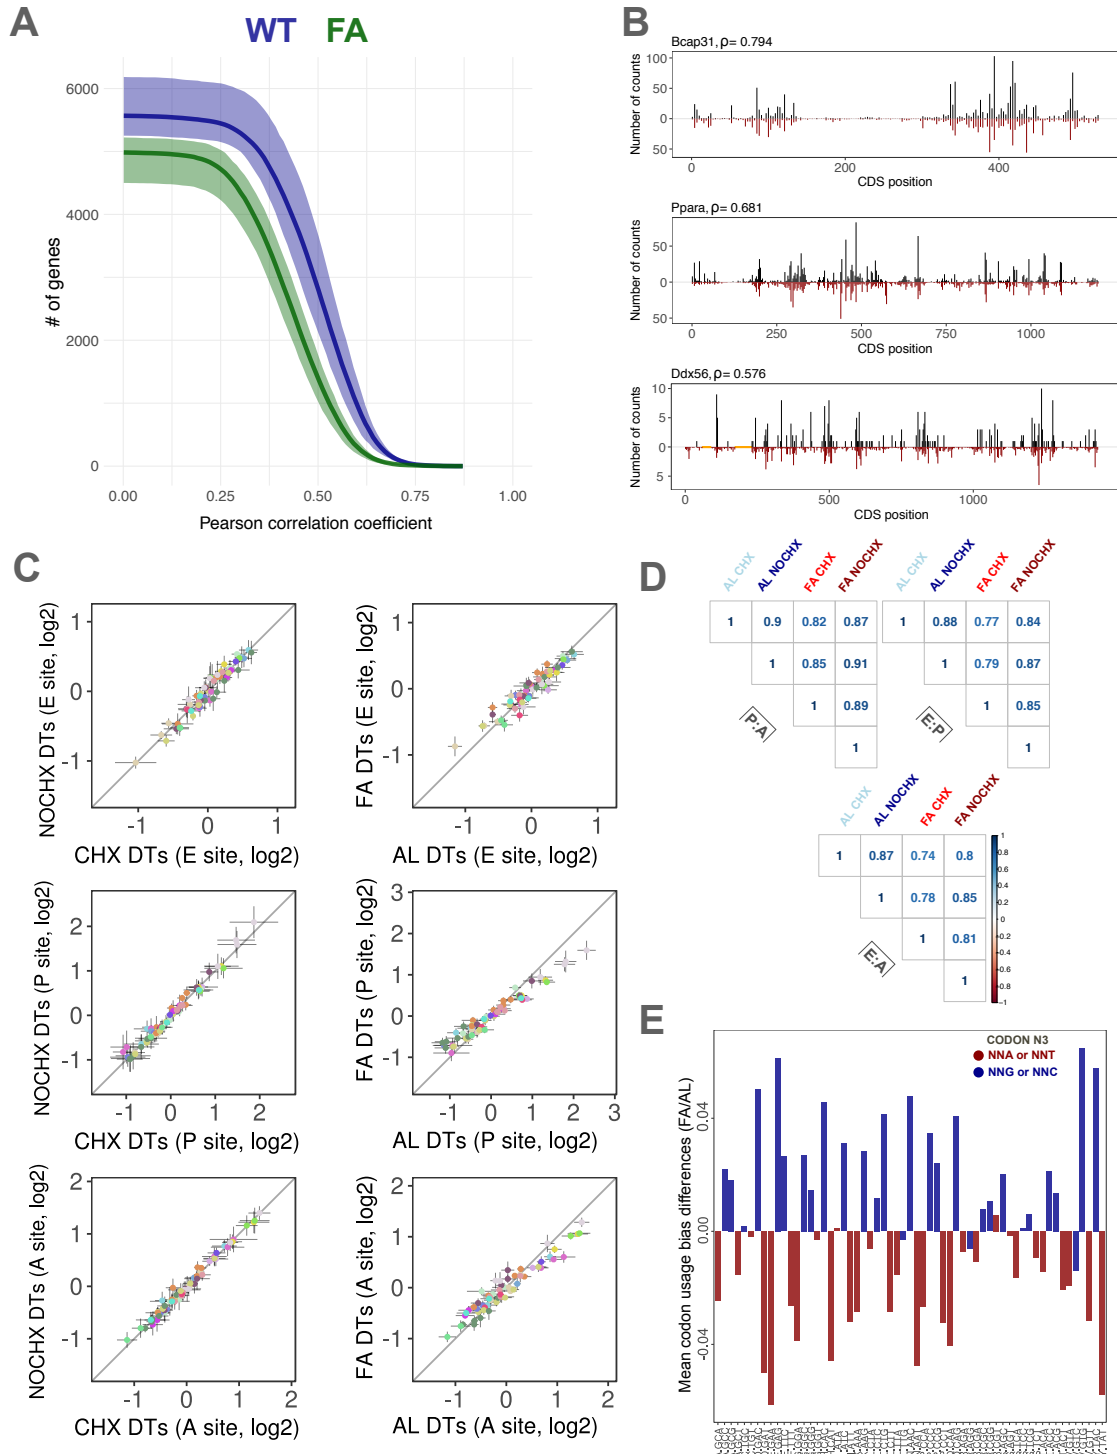

Figure S5: **Ribosome DTs are not affected in fasted mice and with cycloheximide**

A. Gene-specific Pearson correlation coefficient ( $\rho$ ) between measured and fitted read counts. Number of genes with  $\rho$  larger than x-axis values are depicted. WT (blue) and FA (green) B. Measured (black) and fitted (red) read counts for three representative genes in one AL sample. C. DTs in the E (top), P (middle) and A site (bottom) for the CHX vs. NOCHX conditions (left) and AL vs. FA conditions (right). Standard deviation is depicted. D. Pearson correlation coefficient between the different conditions for the interaction terms (log<sub>2</sub>) E:P, P:A, and E:A. E. Codon usage bias is computed for each gene up- or down-regulated in fasted animals and averaged. The difference in codon usage bias is computed between the FA and AL conditions. Codons are colored accordingly to their nucleotide at the third position (G-C in blue and A-T in red).

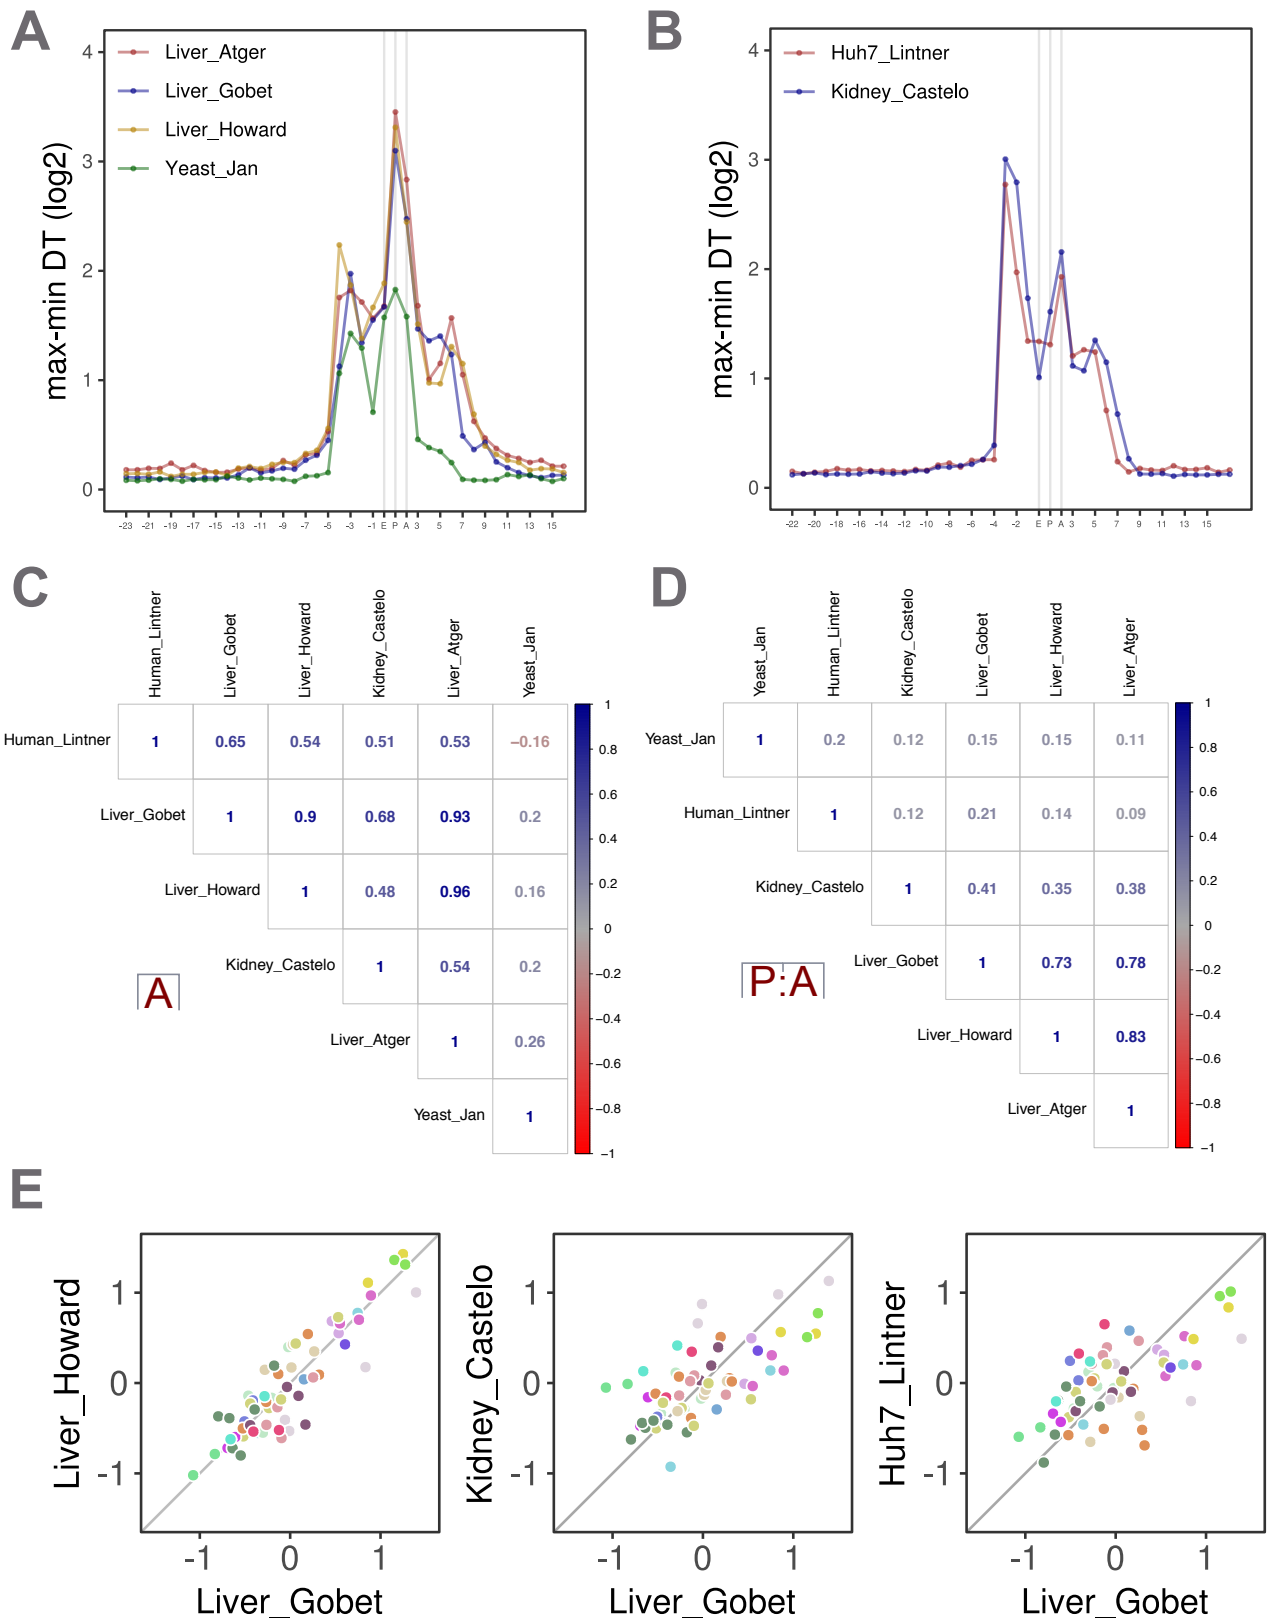

**Figure S6: Meta-analysis revealed conserved DT patterns and technical biases**

Analysis of published ribosome profiling datasets in yeast (Yeast Jan) [49], mouse liver (Liver Atger, Liver Howard, Liver Gobet (this paper)) [51, 57], mouse kidney (Kidney Castelo) [58] and in a human hepatocyte cell line (Huh7 Lintner) [59]. DTs were inferred for each sample and averaged by condition. A. Spread of the DTs (max-min, log<sub>2</sub>) at every positions in a window of 40 codons around the E site for studies using small RNA library protocols. Colors show the different datasets. B. Same as (A) for studies using "cDNA circularization" library protocols. C. Correlation for the A site DTs between the different datasets (Pearson coefficient is color coded). D. Same as (C) for P:A interaction. E. DTs in the A site for the Liver Howard, Kidney Castelo and Huh7 Linter datasets vs. DTs in the A site from the RP data in this paper (Liver Gobet, AL and FA).

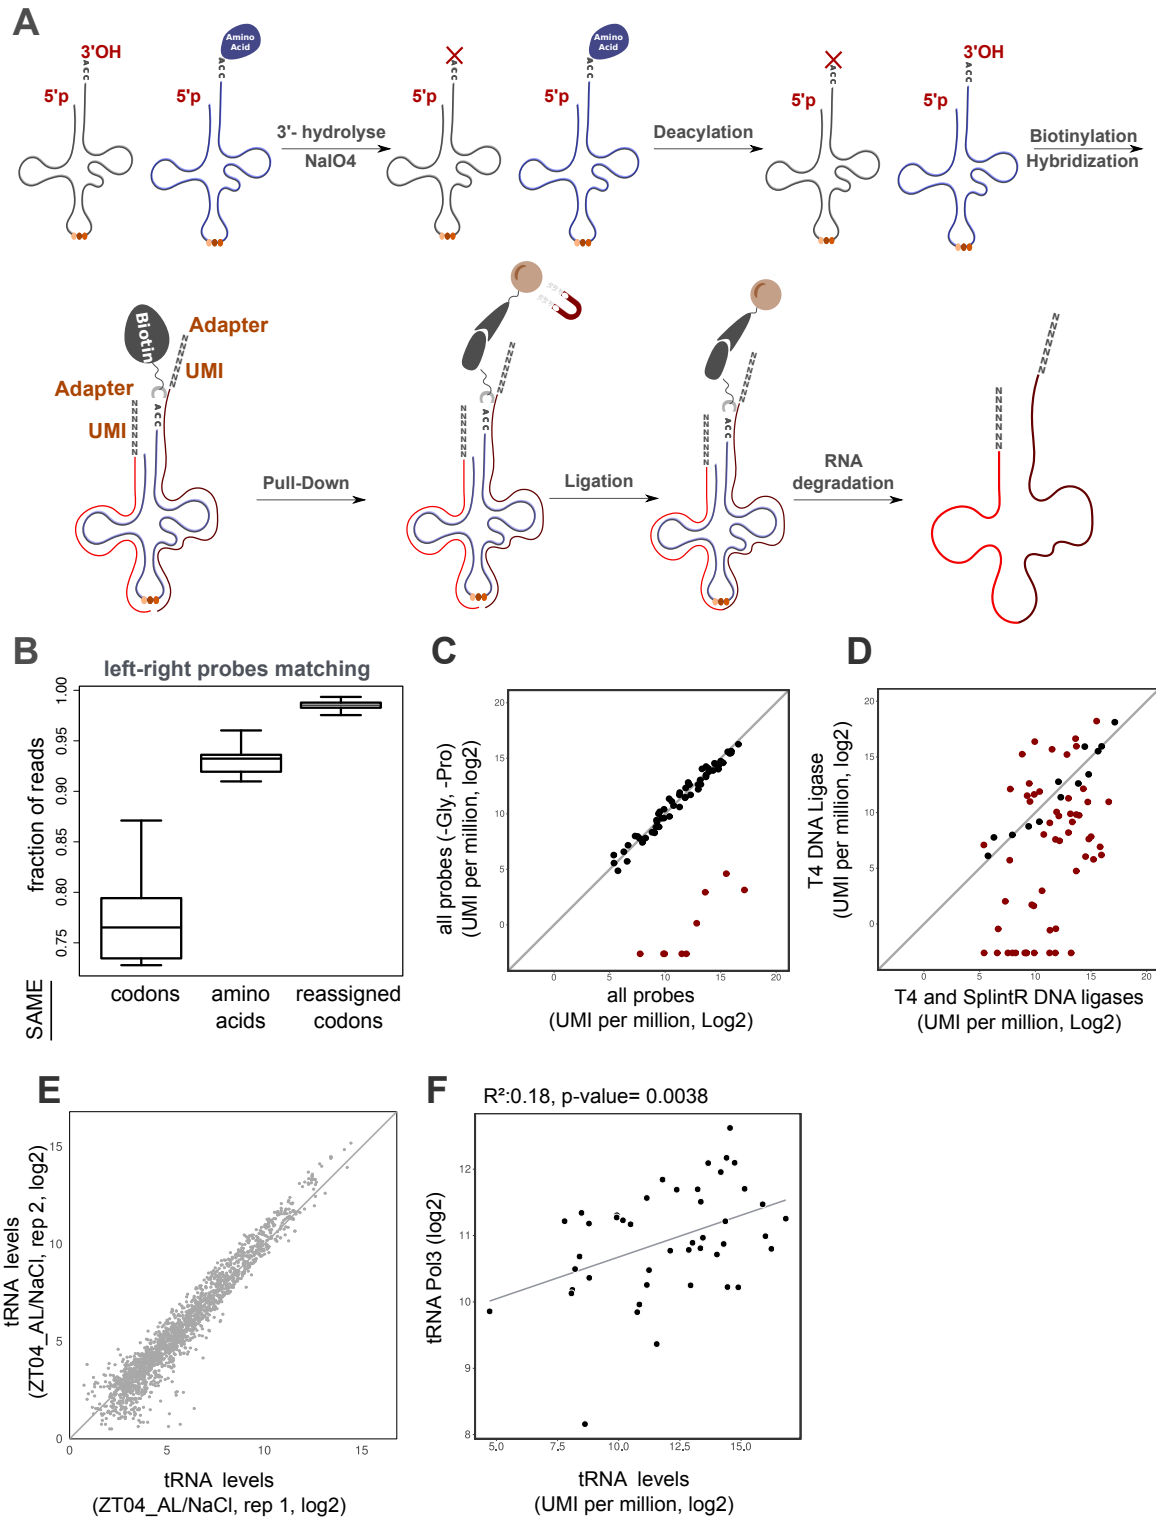

Figure S7: (aminoacyl-) tRNA profiling in AL and FA mice (bis)

A. tRNA profiling protocol. tRNAs were extracted in acidic conditions and uncharged tRNAs were hydrolyzed at 3'-end upon periodate treatment. tRNAs were treated with NaCl in control conditions. Then, tRNAs were deacylated and biotinylated at their 3'-end. Mix of left and right DNA probes were hybridized to the tRNA pools and pulled-down on magnetic beads through biotin-streptavidin interactions. Nicks in the anticodon between the left and right probes were ligated. tRNAs were degraded and DNA probes sequenced after amplification. B. Reads were mapped on every combination of left and right probes. Fraction of reads corresponding to left-right probe combinations belonging to the same codon or amino acid is reported for the 24 samples. The same measure is computed after reassignment of the probe combinations (Methods). C. tRNA abundances (log<sub>2</sub>) at the codon level for the control vs. altered conditions in which probes related to tRNAs coding for Pro and Gly were removed. D. tRNA abundances (log<sub>2</sub>) at the codon level for experiments with T4 or SplintR DNA ligases. Significant differences are shown in red. E. tRNA abundances (log<sub>2</sub>) at the probe level between biological replicates in the NaCl/AL condition at ZT04. F. Correlation between tRNA abundances in control AL vs. RNA polymerase III (POL3) ChIP-Seq signal quantified on the tRNAs gene loci. Data were extracted from the supplementary table of ref. [62].

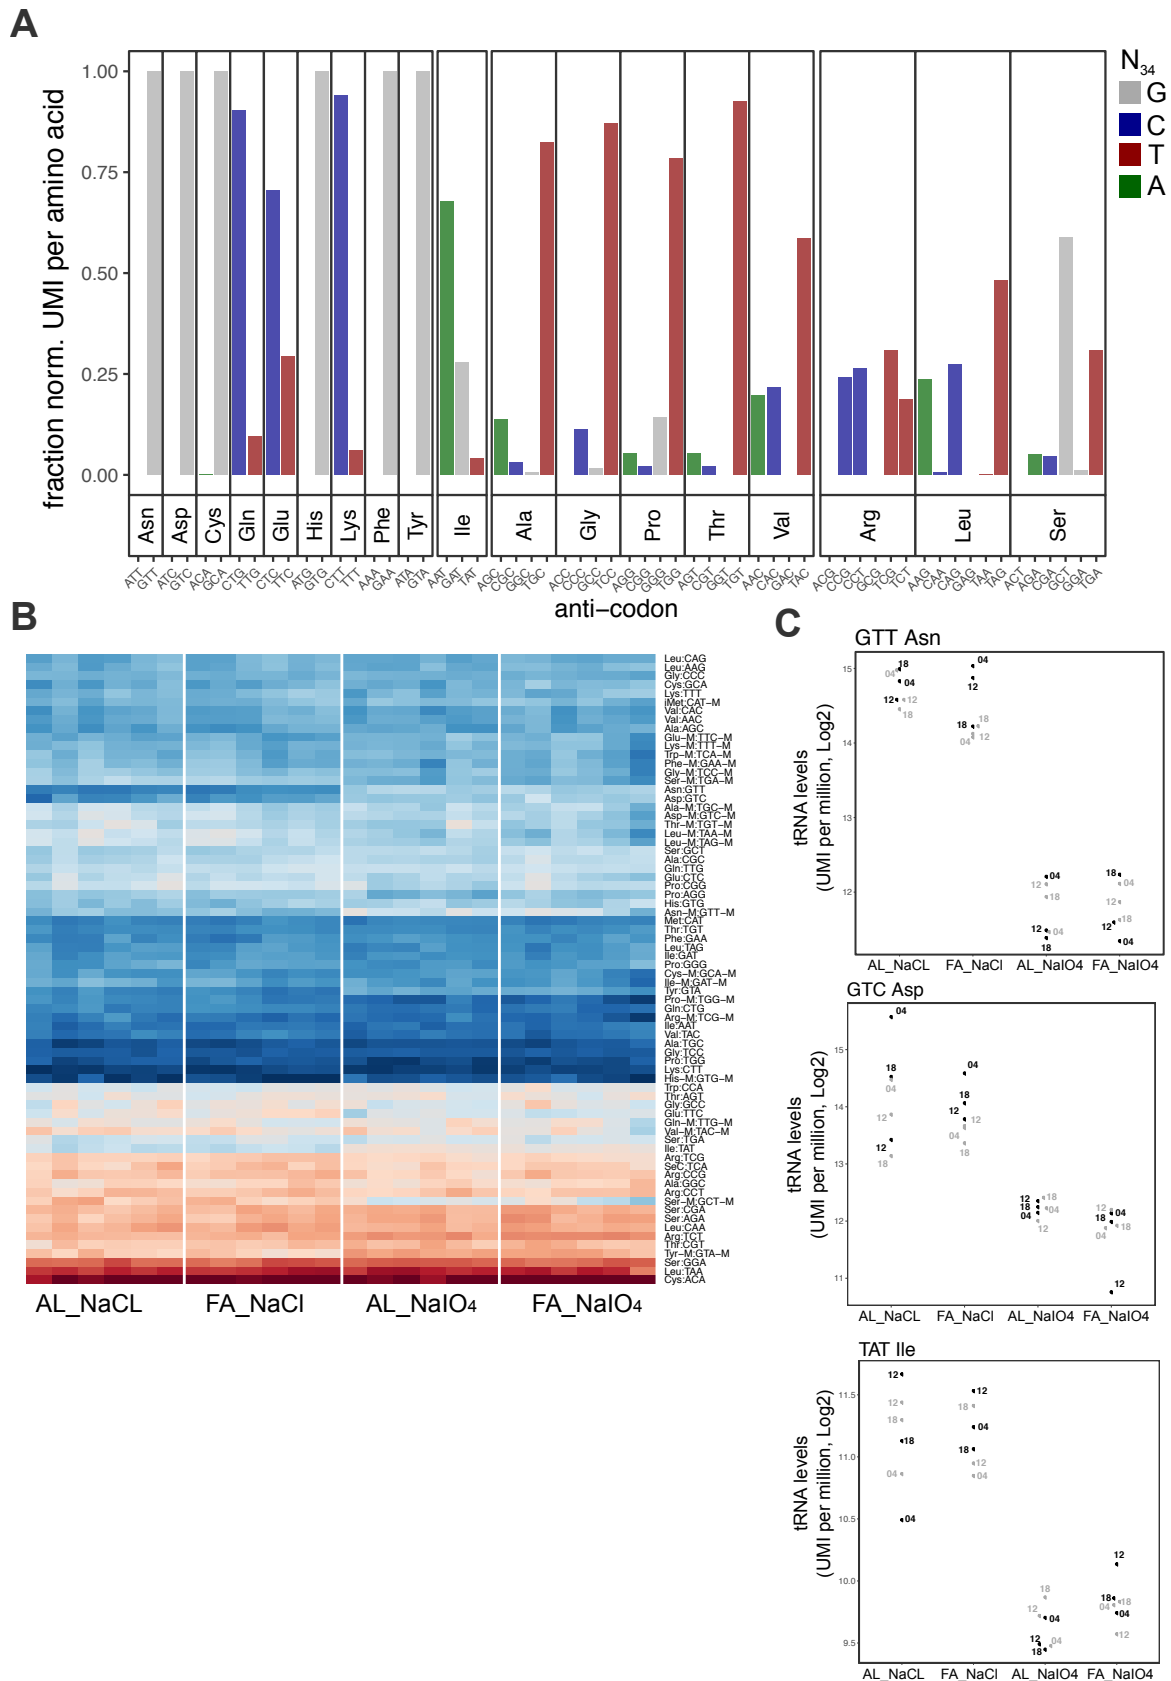

Figure S8: (aminoacyl)- tRNA profiling in AL and FA mice (bis)

A. Fraction of reads (UMI) per amino acid for the different isoacceptor tRNAs. Colors indicate the nucleotide in position 34 on the tRNA. B. Heatmaps of the normalized tRNA read counts (log2) at the codon level for the 24 samples. tRNAs are ordered with hierarchical clustering. Dark blue (high), dark red (low). C. Expression levels for three tRNA coding respectively for Asn, Asp, and Ile, showing 5-8 fold differences between control and periodate-treated conditions.
